# Supplementary material for: New Ceramides and Cerebrosides from the Deep-Sea Far Eastern Starfish Ceramaster patagonicus
Source: MDPI journal article supplement (doi:10.3390/md20100641), 2022-10-14

## Supplementary Materials

# New Ceramides and Cerebrosides from the Deep-Sea Far Eastern Starfish *Ceramaster patagonicus*

Timofey V. Malyarenko <sup>1,2,\*</sup>, Viktor M. Zakharenko <sup>1,2</sup>, Alla A. Kicha <sup>1</sup>, Alexandra S. Kuzmich <sup>1</sup>, Olesya S. Malyarenko <sup>1</sup>, Anatoly I. Kalinovsky <sup>1</sup>, Roman S. Popov <sup>1</sup>, Vasily I. Svetashev <sup>3</sup> and Natalia V. Ivanchina <sup>1,\*</sup>

<sup>1</sup> G.B. Elyakov Pacific Institute of Bioorganic Chemistry, Far Eastern Branch, Russian Academy of Sciences, Pr. 100-let Vladivostoku 159, 690022 Vladivostok, Russia

<sup>2</sup> Department of Bioorganic Chemistry and Biotechnology, School of Natural Sciences, Far Eastern Federal University, Russky Island, Ajax Bay 10, 690922 Vladivostok, Russia

<sup>3</sup> A.V. Zhirmunsky National Scientific Center of Marine Biology, Far Eastern Branch, Russian Academy of Sciences, ul. Palchevskogo 17, 690041 Vladivostok, Russia

\* Correspondence: malyarenko-tv@mail.ru (T.V.M.); ivanchina@piboc.dvo.ru (N.V.I.); Tel.: +7-423-2312-360 (N.V.I.); Fax: +7-423-2314-050 (N.V.I.)

## List

- Figure S1.** (–)-HRESIMS spectrum of ceramide **1**.
- Figure S2.** (+)-HRESIMS spectrum of ceramide **1**.
- Figure S3.**  $^1\text{H}$ -NMR spectrum of ceramide **1** in  $\text{C}_5\text{D}_5\text{N}$ .
- Figure S4.**  $^{13}\text{C}$ -NMR spectrum of ceramide **1** in  $\text{C}_5\text{D}_5\text{N}$ .
- Figure S5.**  $^1\text{H}$ - $^1\text{H}$ -COSY spectrum of ceramide **1** in  $\text{C}_5\text{D}_5\text{N}$ .
- Figure S6.** HSQC spectrum of ceramide **1** in  $\text{C}_5\text{D}_5\text{N}$ .
- Figure S7.** HMBC spectrum of ceramide **1** in  $\text{C}_5\text{D}_5\text{N}$ .
- Figure S8.** 2D TOCSY spectrum of ceramide **1** in  $\text{C}_5\text{D}_5\text{N}$ .
- Figure S9.** (–)-HRESIMS spectrum of ceramide **2**.
- Figure S10.** (+)-HRESIMS spectrum of ceramide **2**.
- Figure S11.**  $^1\text{H}$ -NMR spectrum of ceramide **2** in  $\text{C}_5\text{D}_5\text{N}$ .
- Figure S12.**  $^{13}\text{C}$ -NMR spectrum of ceramide **2** in  $\text{C}_5\text{D}_5\text{N}$ .
- Figure S13.**  $^1\text{H}$ - $^1\text{H}$ -COSY spectrum of ceramide **2** in  $\text{C}_5\text{D}_5\text{N}$ .
- Figure S14.** HSQC spectrum of ceramide **2** in  $\text{C}_5\text{D}_5\text{N}$ .
- Figure S15.** HMBC spectrum of ceramide **2** in  $\text{C}_5\text{D}_5\text{N}$ .
- Figure S16.** (–)-HRESIMS spectrum of ceramide **3**.
- Figure S17.** (+)-HRESIMS spectrum of ceramide **3**.
- Figure S18.**  $^1\text{H}$ -NMR spectrum of ceramide **3** in  $\text{C}_5\text{D}_5\text{N}$ .
- Figure S19.**  $^{13}\text{C}$ -NMR spectrum of ceramide **3** in  $\text{C}_5\text{D}_5\text{N}$ .
- Figure S20.**  $^1\text{H}$ - $^1\text{H}$ -COSY spectrum of ceramide **3** in  $\text{C}_5\text{D}_5\text{N}$ .
- Figure S21.** HSQC spectrum of ceramide **3** in  $\text{C}_5\text{D}_5\text{N}$ .
- Figure S22.** HMBC spectrum of ceramide **3** in  $\text{C}_5\text{D}_5\text{N}$ .

**Figure S23.** (–)-HRESIMS spectrum of cerebroside **4**.

**Figure S24.** (+)-HRESIMS spectrum of cerebroside **4**.

**Figure S25.**  $^1\text{H}$ -NMR spectrum of cerebroside **4** in  $\text{C}_5\text{D}_5\text{N}$ .

**Figure S26.**  $^{13}\text{C}$ -NMR spectrum of cerebroside **4** in  $\text{C}_5\text{D}_5\text{N}$ .

**Figure S27.**  $^1\text{H}$ - $^1\text{H}$ -COSY spectrum of cerebroside **4** in  $\text{C}_5\text{D}_5\text{N}$ .

**Figure S28.** HSQC spectrum of cerebroside **4** in  $\text{C}_5\text{D}_5\text{N}$ .

**Figure S29.** HMBC spectrum of cerebroside **4** in  $\text{C}_5\text{D}_5\text{N}$ .

**Figure S30.** (–)-HRESIMS spectrum of cerebroside **8**.

**Figure S31.** (+)-HRESIMS spectrum of cerebroside **8**.

**Figure S32.**  $^1\text{H}$ -NMR spectrum of cerebroside **8** in  $\text{C}_5\text{D}_5\text{N}$ .

**Figure S33.**  $^{13}\text{C}$ -NMR spectrum of cerebroside **8** in  $\text{C}_5\text{D}_5\text{N}$ .

**Figure S34.**  $^1\text{H}$ - $^1\text{H}$ -COSY spectrum of cerebroside **8** in  $\text{C}_5\text{D}_5\text{N}$ .

**Figure S35.** HSQC spectrum of cerebroside **8** in  $\text{C}_5\text{D}_5\text{N}$ .

**Figure S36.** HMBC spectrum of cerebroside **8** in  $\text{C}_5\text{D}_5\text{N}$ .

**Figure S37.** (–)-HRESIMS spectrum of cerebroside **9**.

**Figure S38.** (+)-HRESIMS spectrum of cerebroside **9**.

**Figure S39.**  $^1\text{H}$ -NMR spectrum of cerebroside **9** in  $\text{C}_5\text{D}_5\text{N}$ .

**Figure S40.**  $^{13}\text{C}$ -NMR spectrum of cerebroside **9** in  $\text{C}_5\text{D}_5\text{N}$ .

**Figure S41.**  $^1\text{H}$ - $^1\text{H}$ -COSY spectrum of cerebroside **9** in  $\text{C}_5\text{D}_5\text{N}$ .

**Figure S42.** HSQC spectrum of cerebroside **9** in  $\text{C}_5\text{D}_5\text{N}$ .

**Figure S43.** HMBC spectrum of cerebroside **9** in  $\text{C}_5\text{D}_5\text{N}$ .

**Figure S1.** (-)-HRESIMS spectrum of ceramide 1.

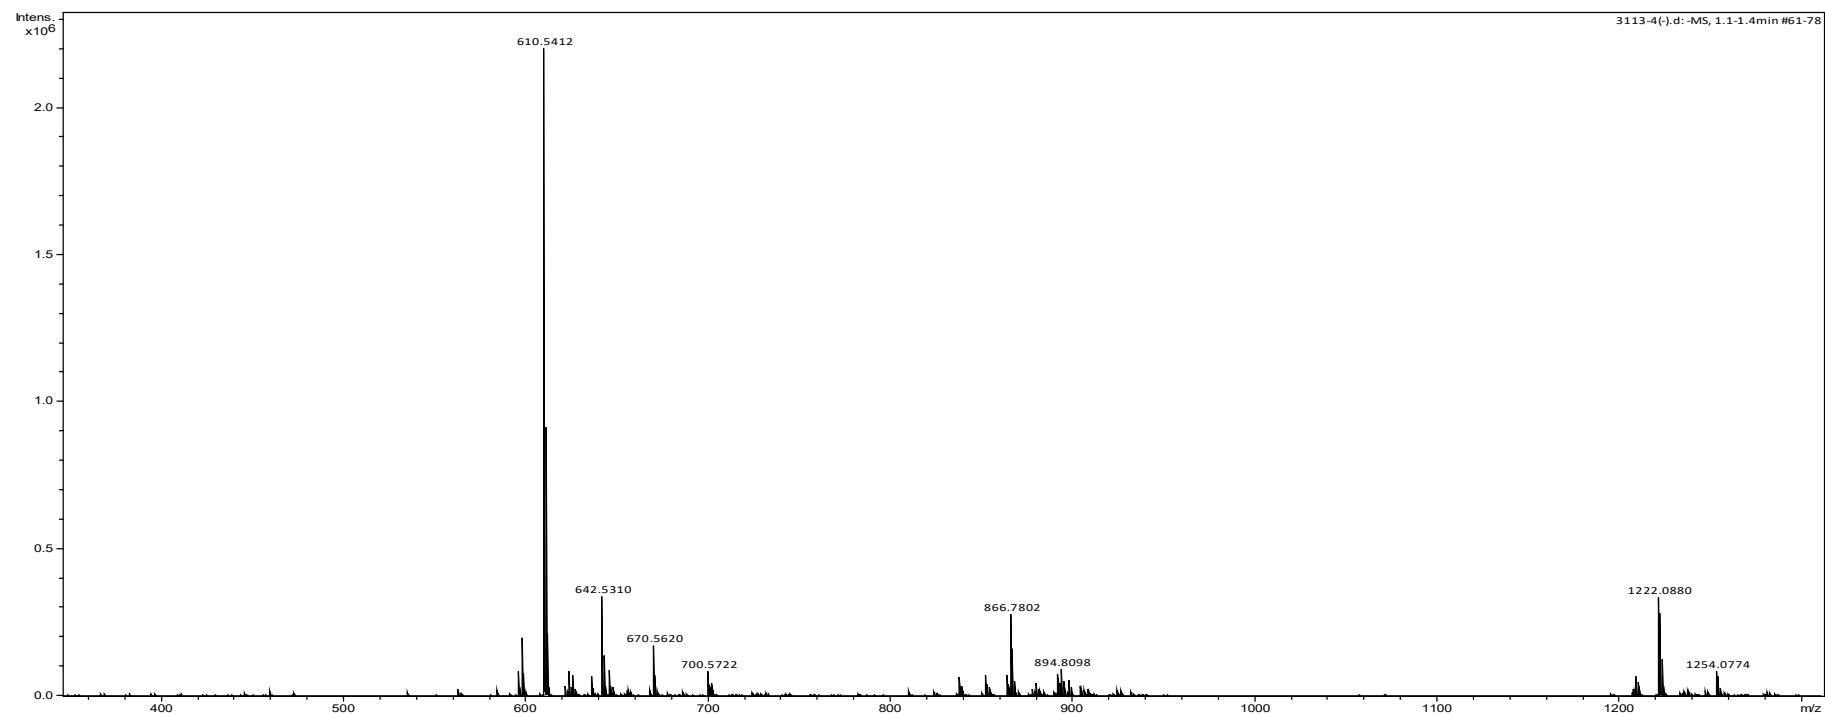

**Figure S2.** (+)-HRESIMS spectrum of ceramide 1.

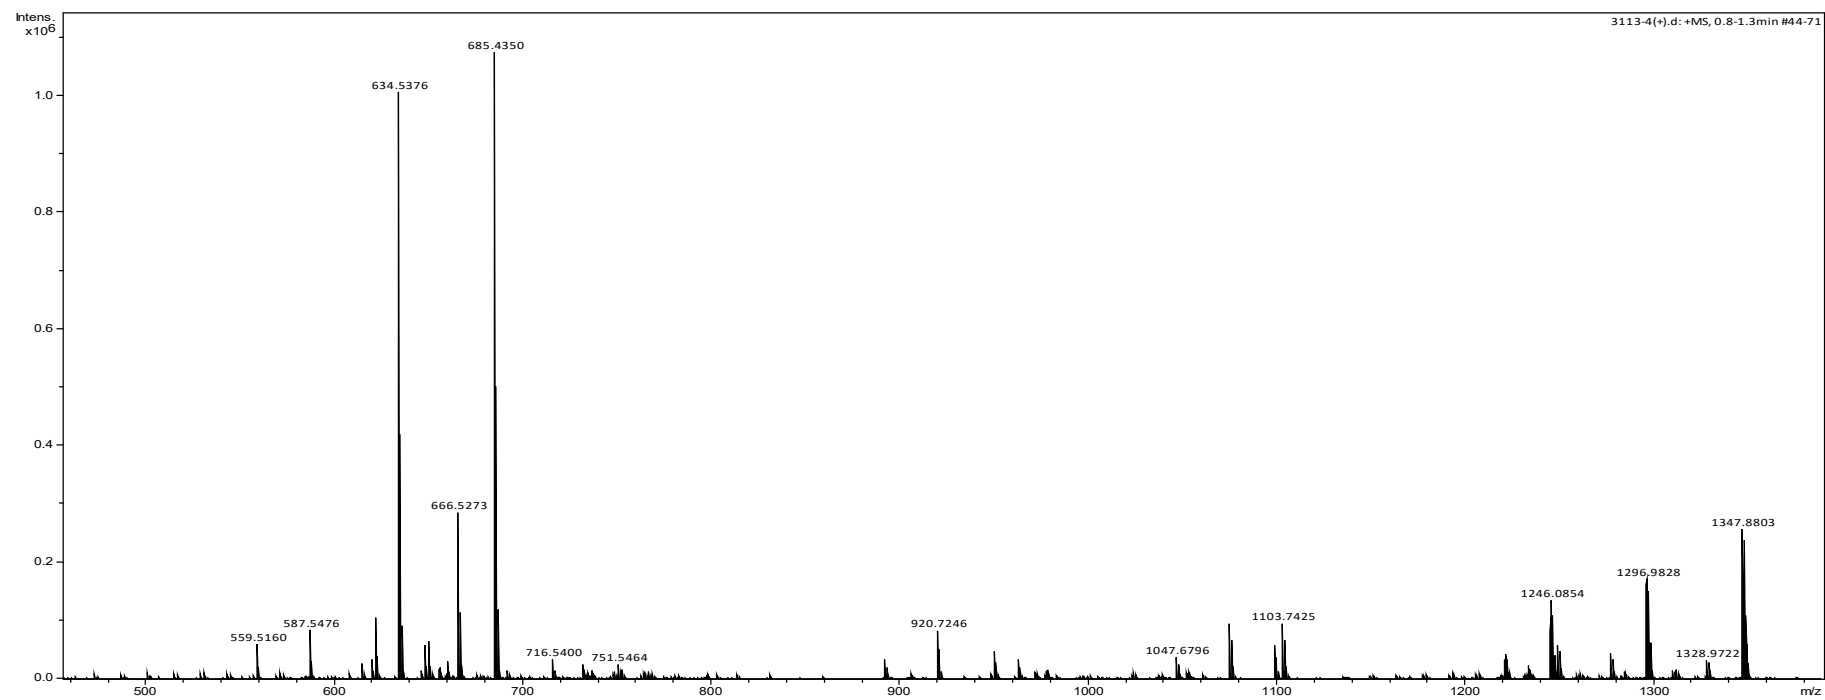

**Figure S3.**  $^1\text{H}$ -NMR spectrum of ceramide **1** in  $\text{C}_5\text{D}_5\text{N}$ .

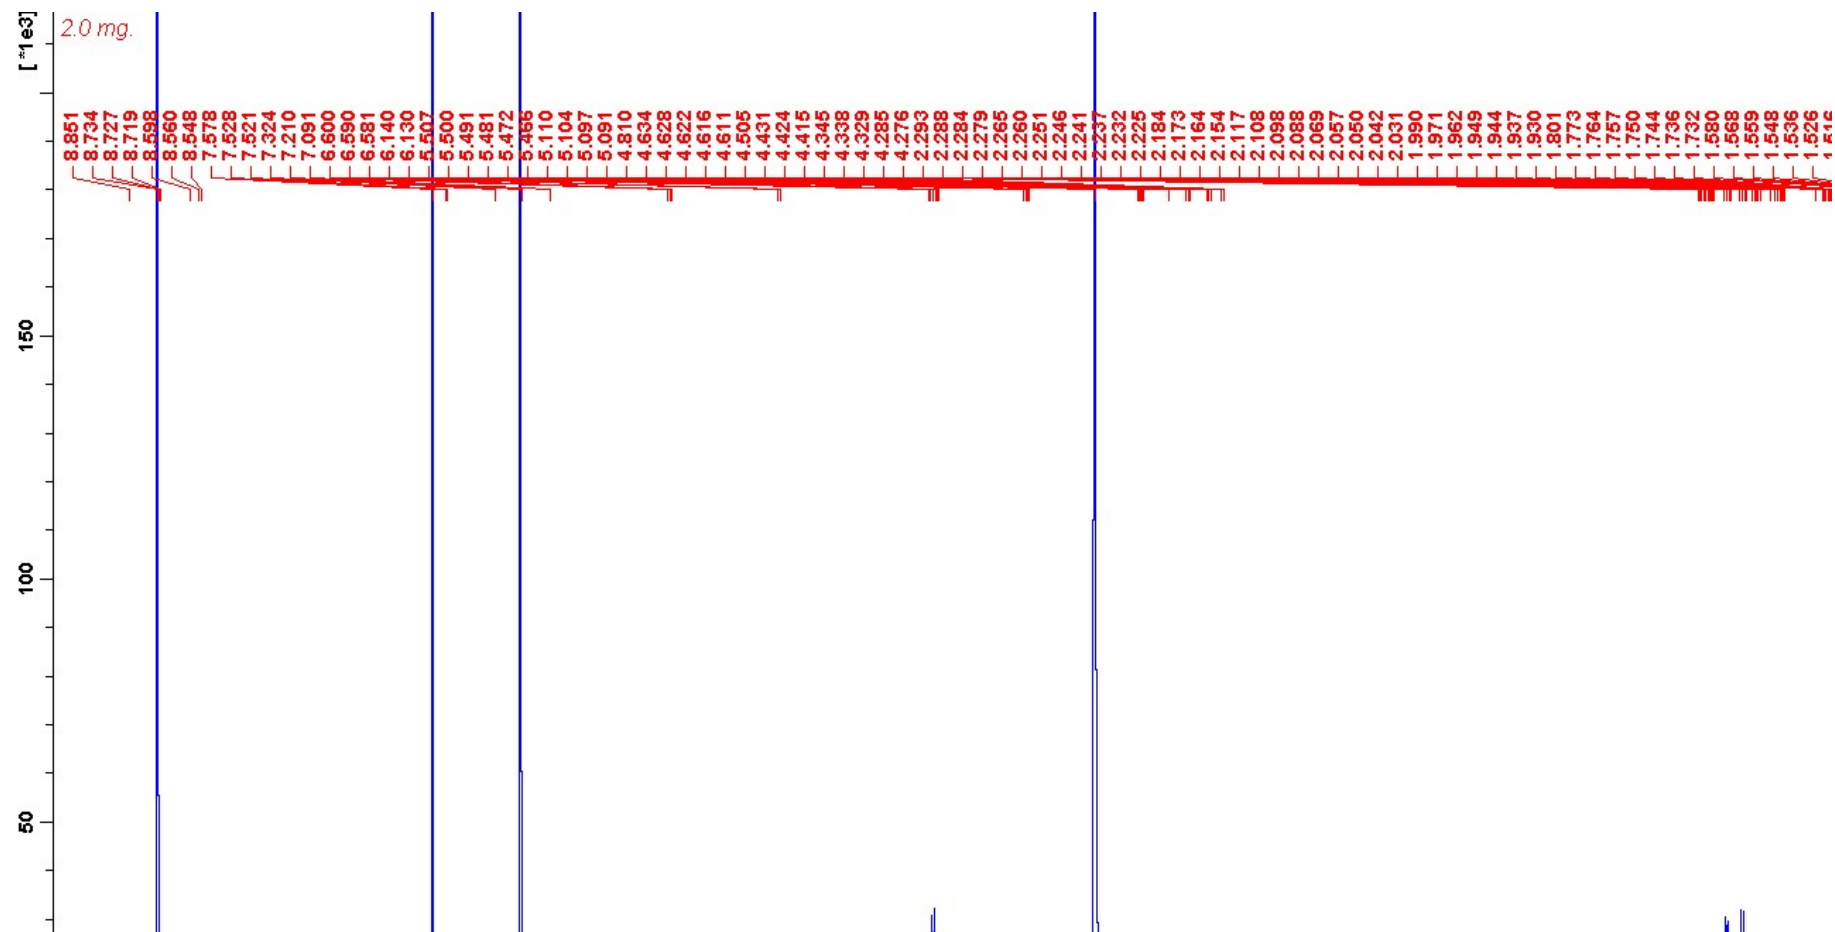

**Figure S4.**  $^{13}\text{C}$ -NMR spectrum of ceramide **1** in  $\text{C}_5\text{D}_5\text{N}$ .

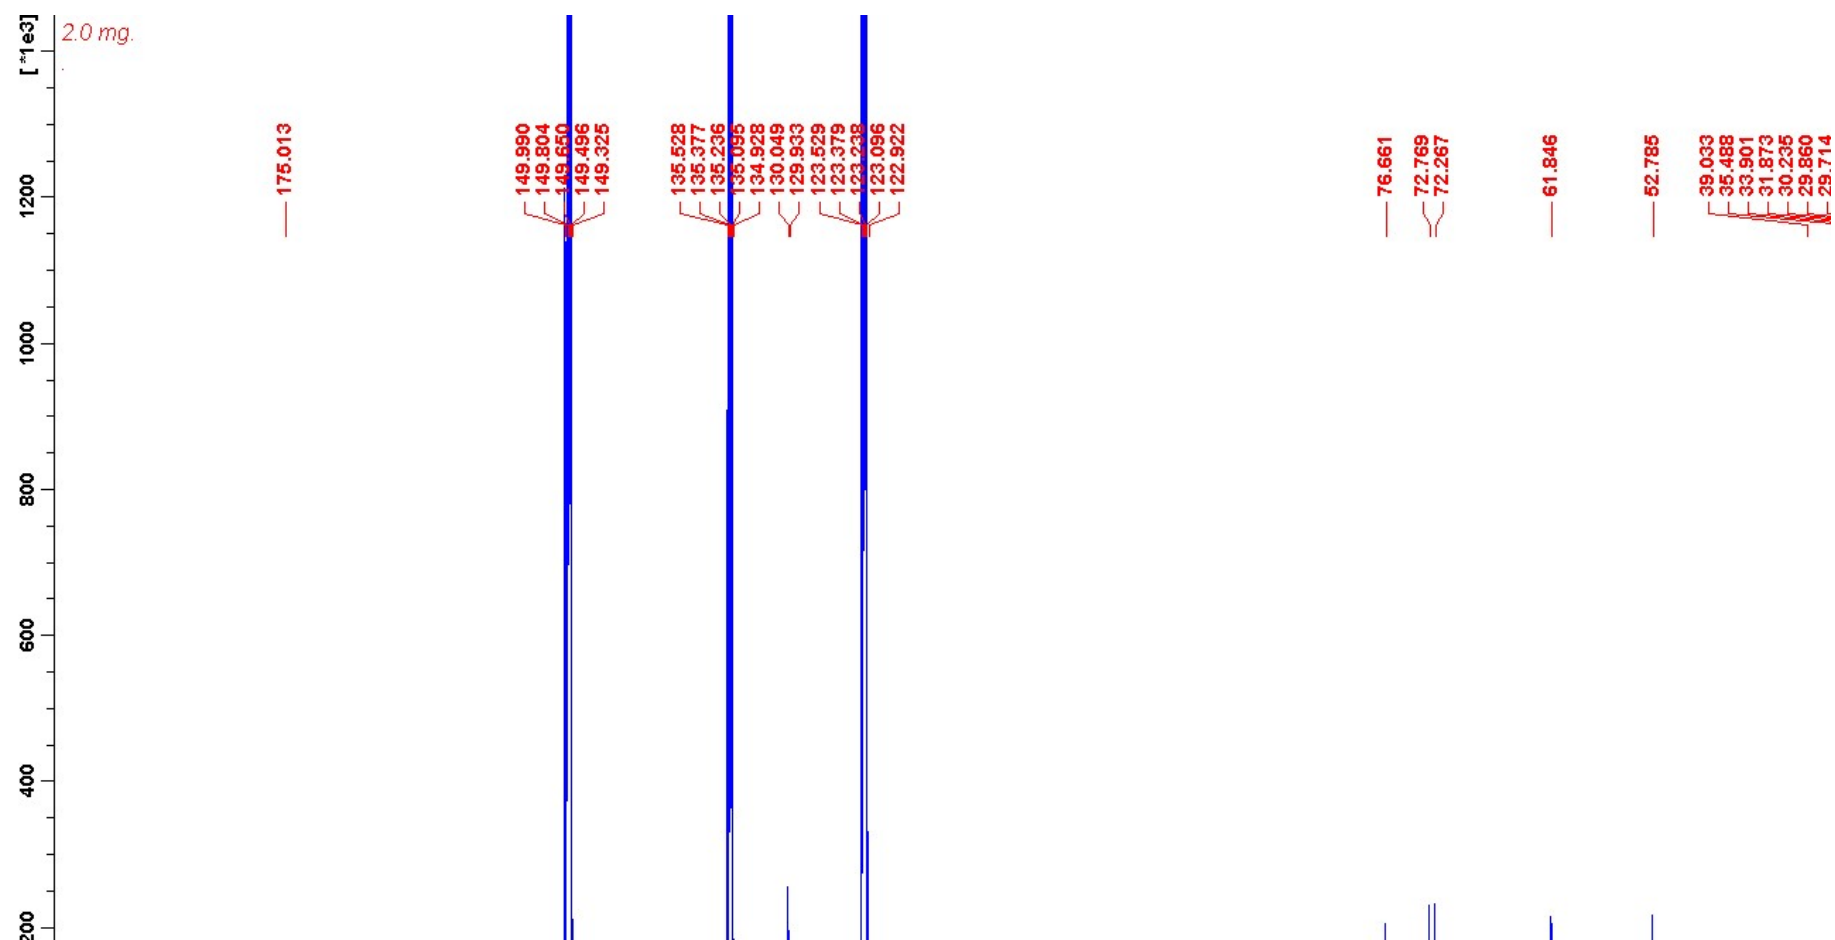

**Figure S5.**  $^1\text{H}$ - $^1\text{H}$ -COSY spectrum of ceramide 1 in  $\text{C}_5\text{D}_5\text{N}$ .

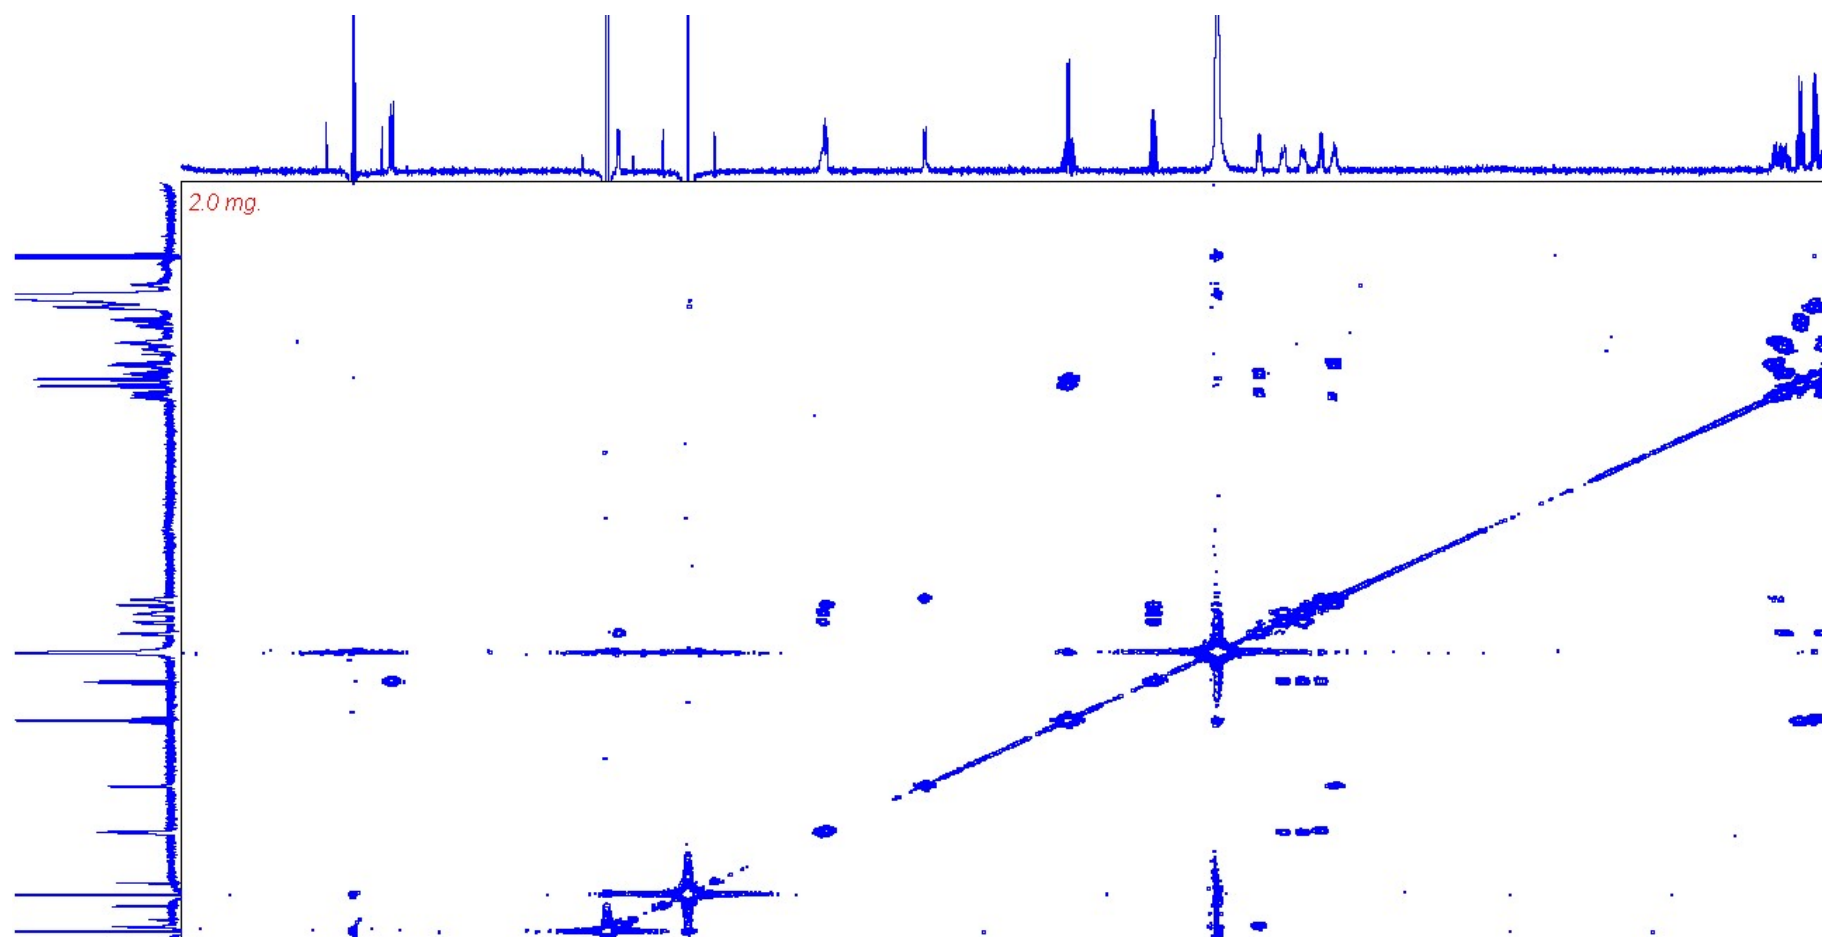



**Figure S6.** HSQC spectrum of ceramide **1** in C<sub>5</sub>D<sub>5</sub>N.

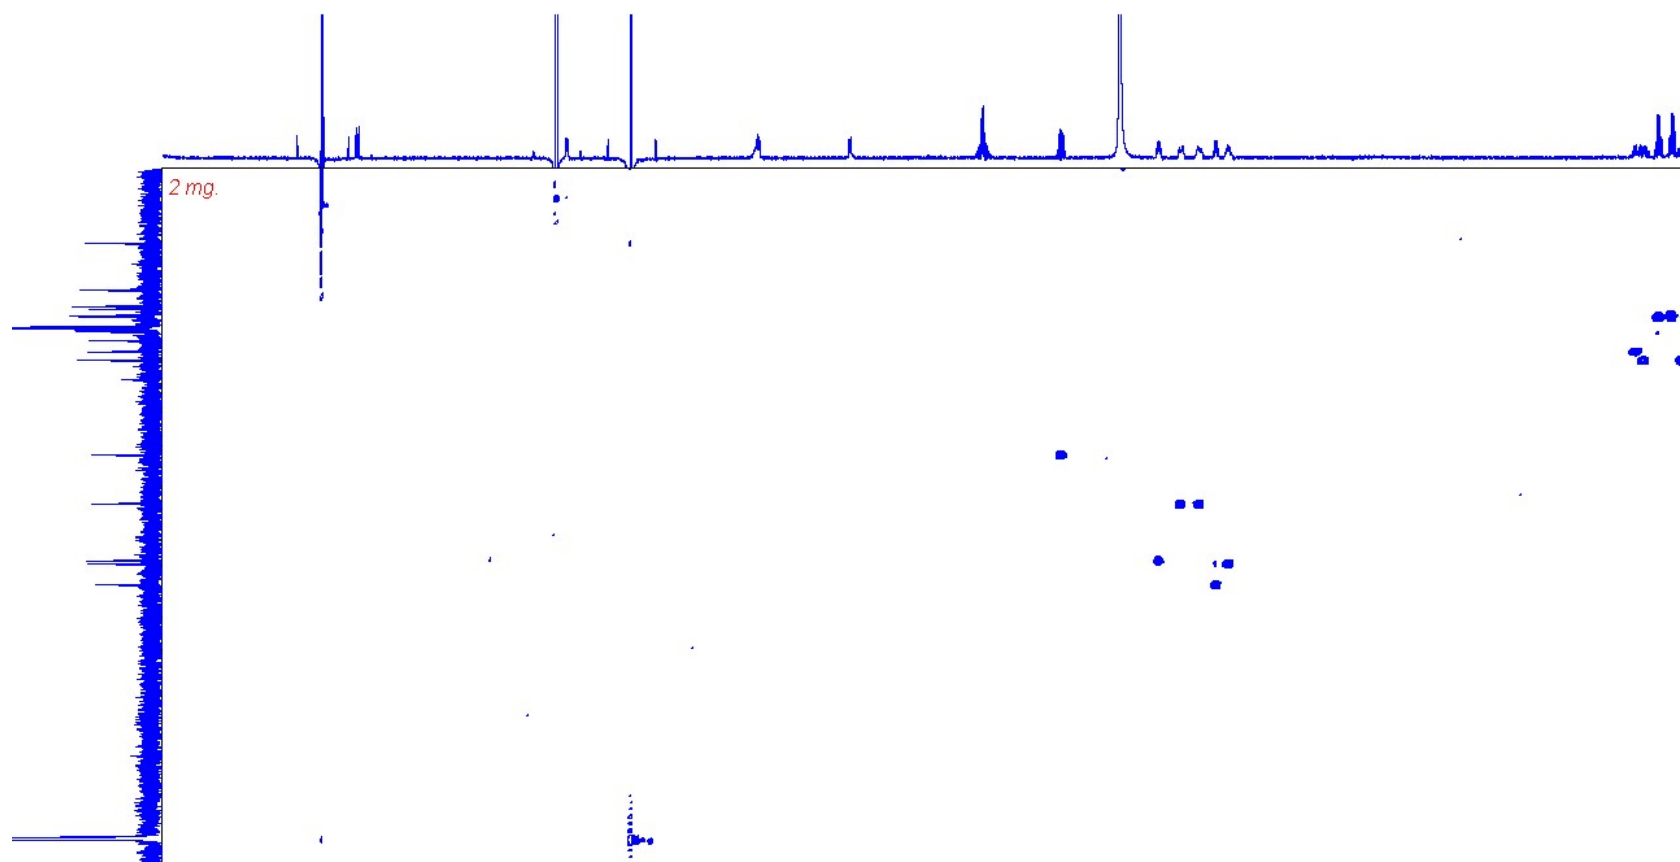

**Figure S7.** HMBC spectrum of ceramide **1** in C<sub>5</sub>D<sub>5</sub>N.

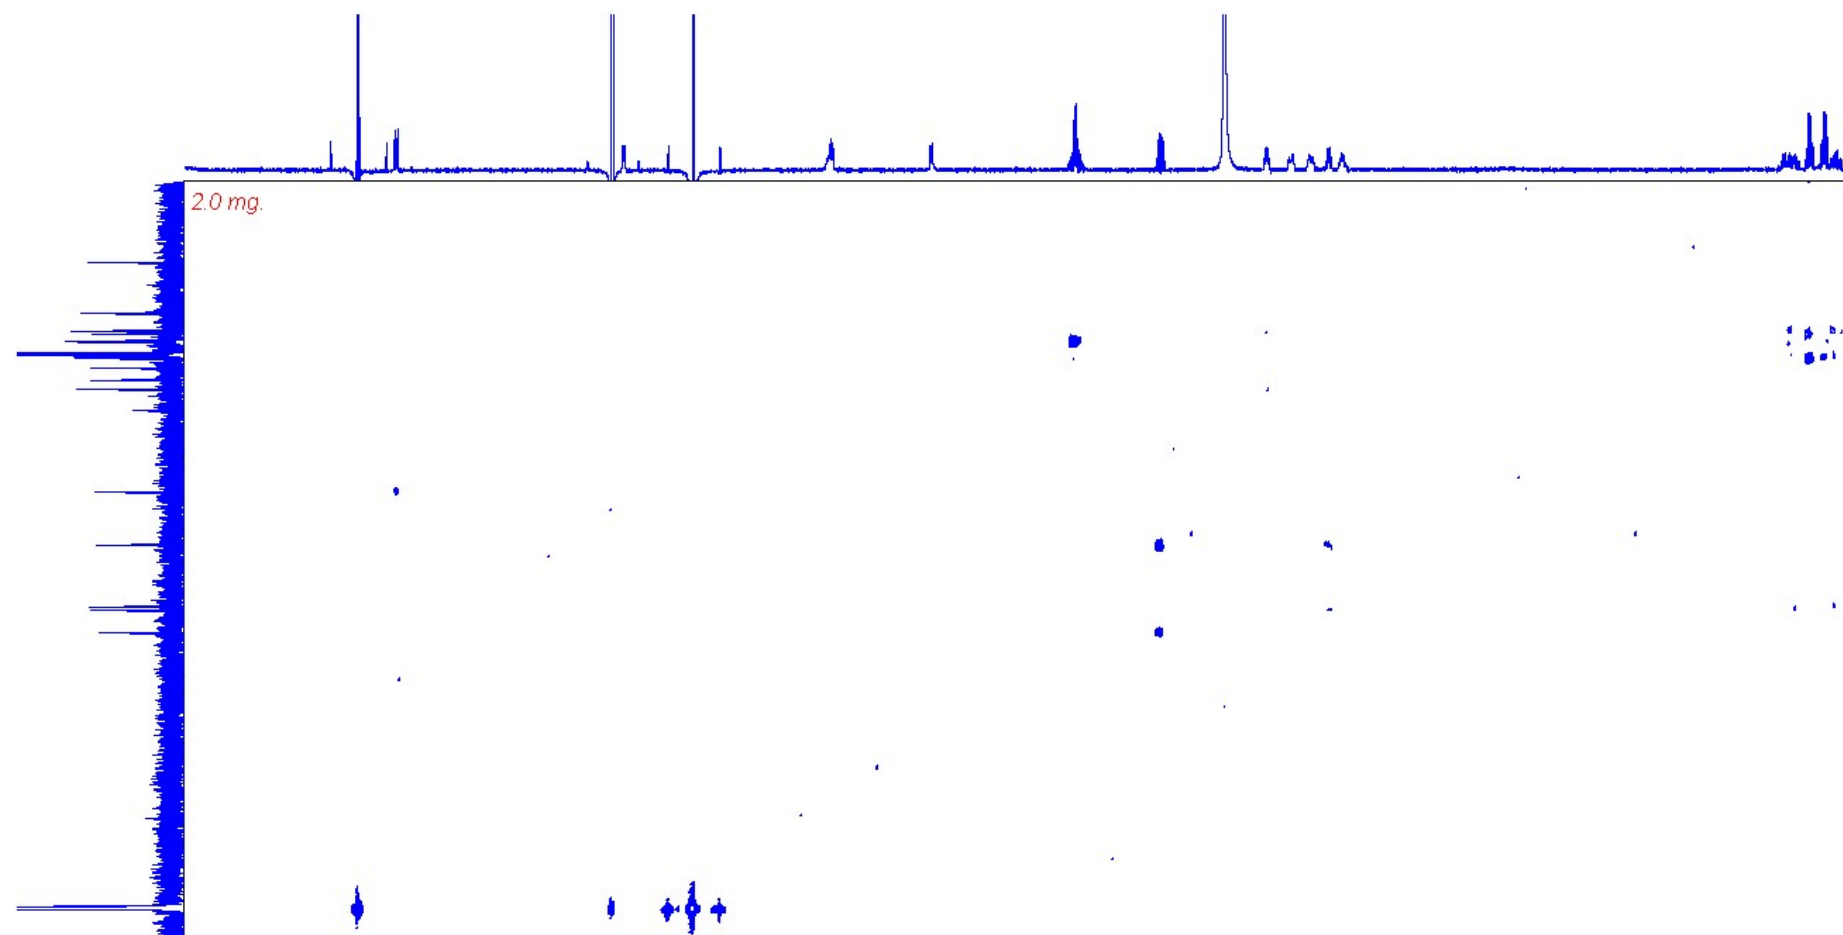

**Figure S8.** 2D TOCSY spectrum of ceramide **1** in  $\text{C}_5\text{D}_5\text{N}$ .

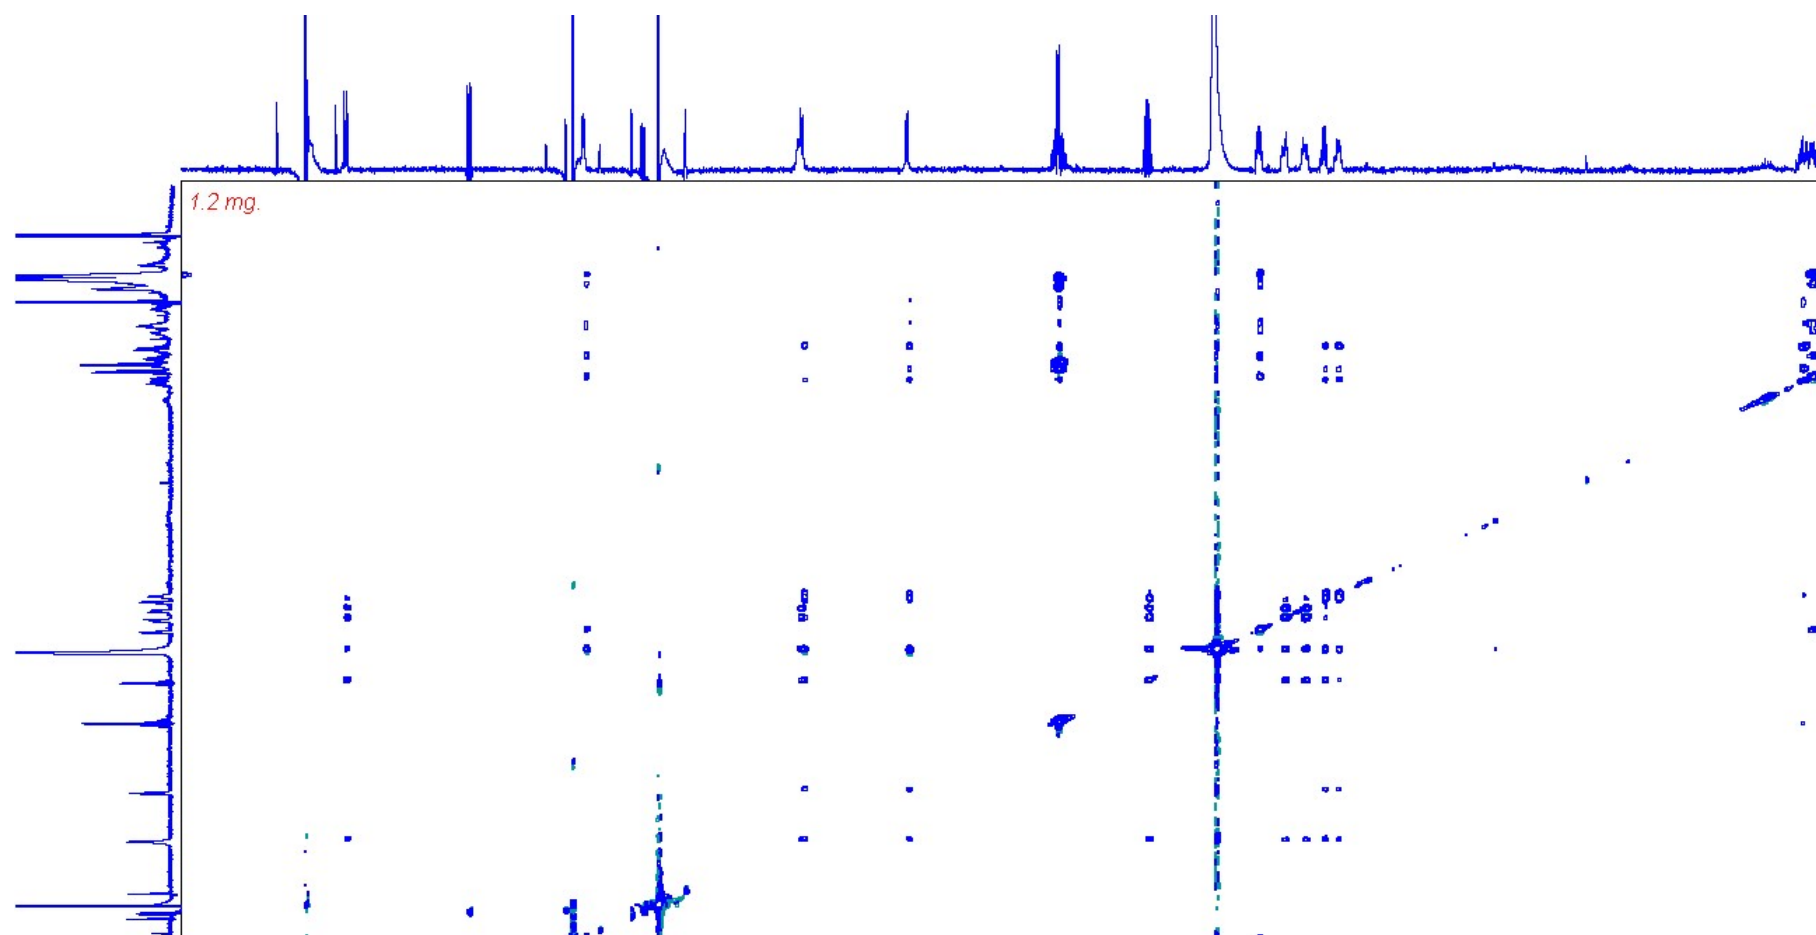

**Figure S9.** (–)-HRESIMS spectrum of ceramide 2.

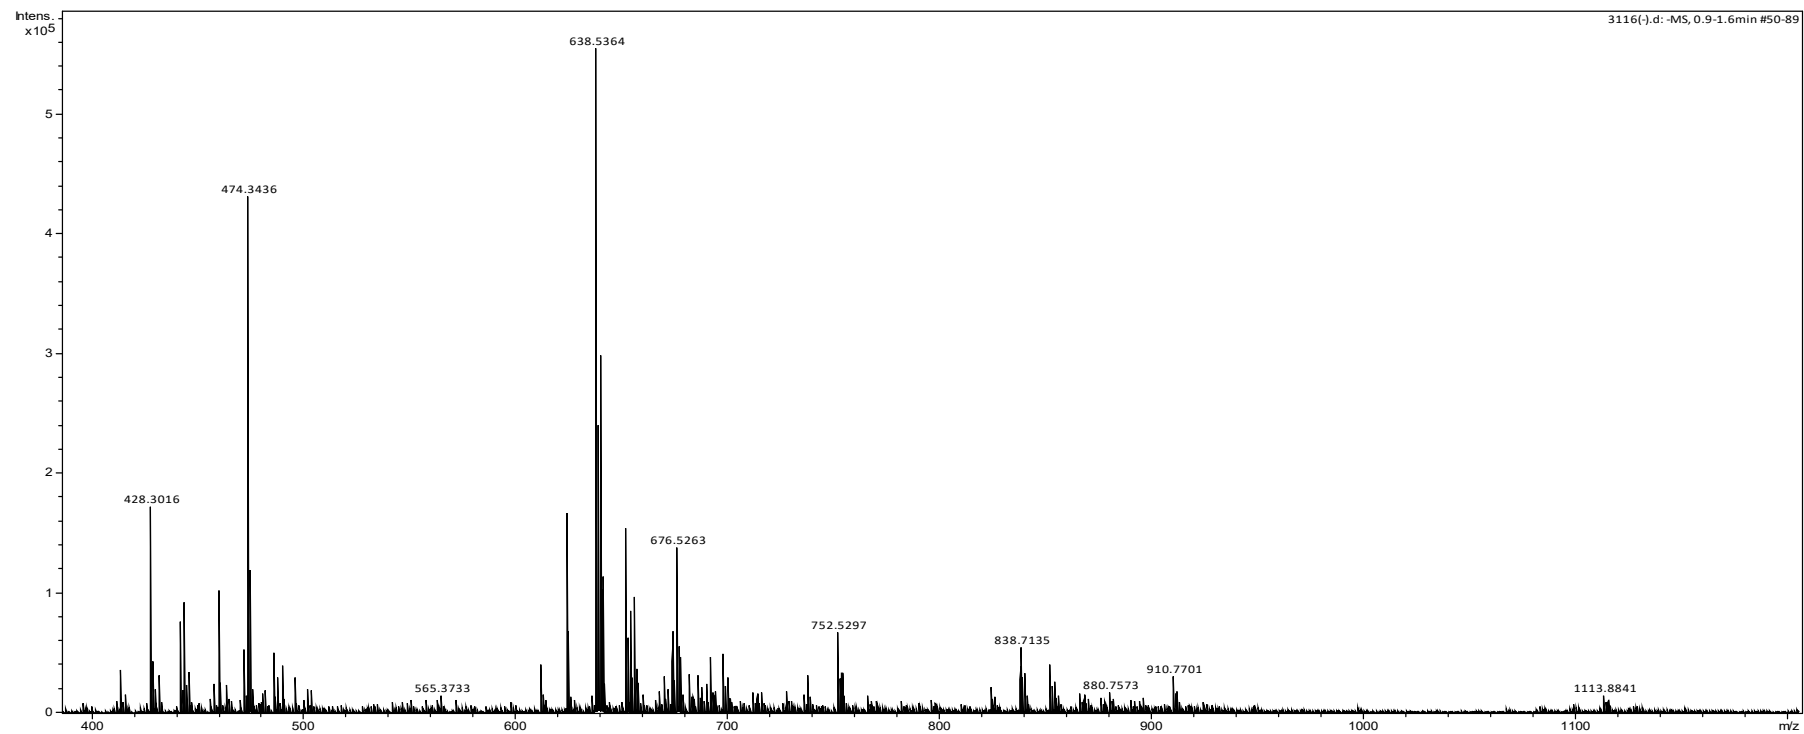

**Figure S10.** (+)-HRESIMS spectrum of ceramide 2.

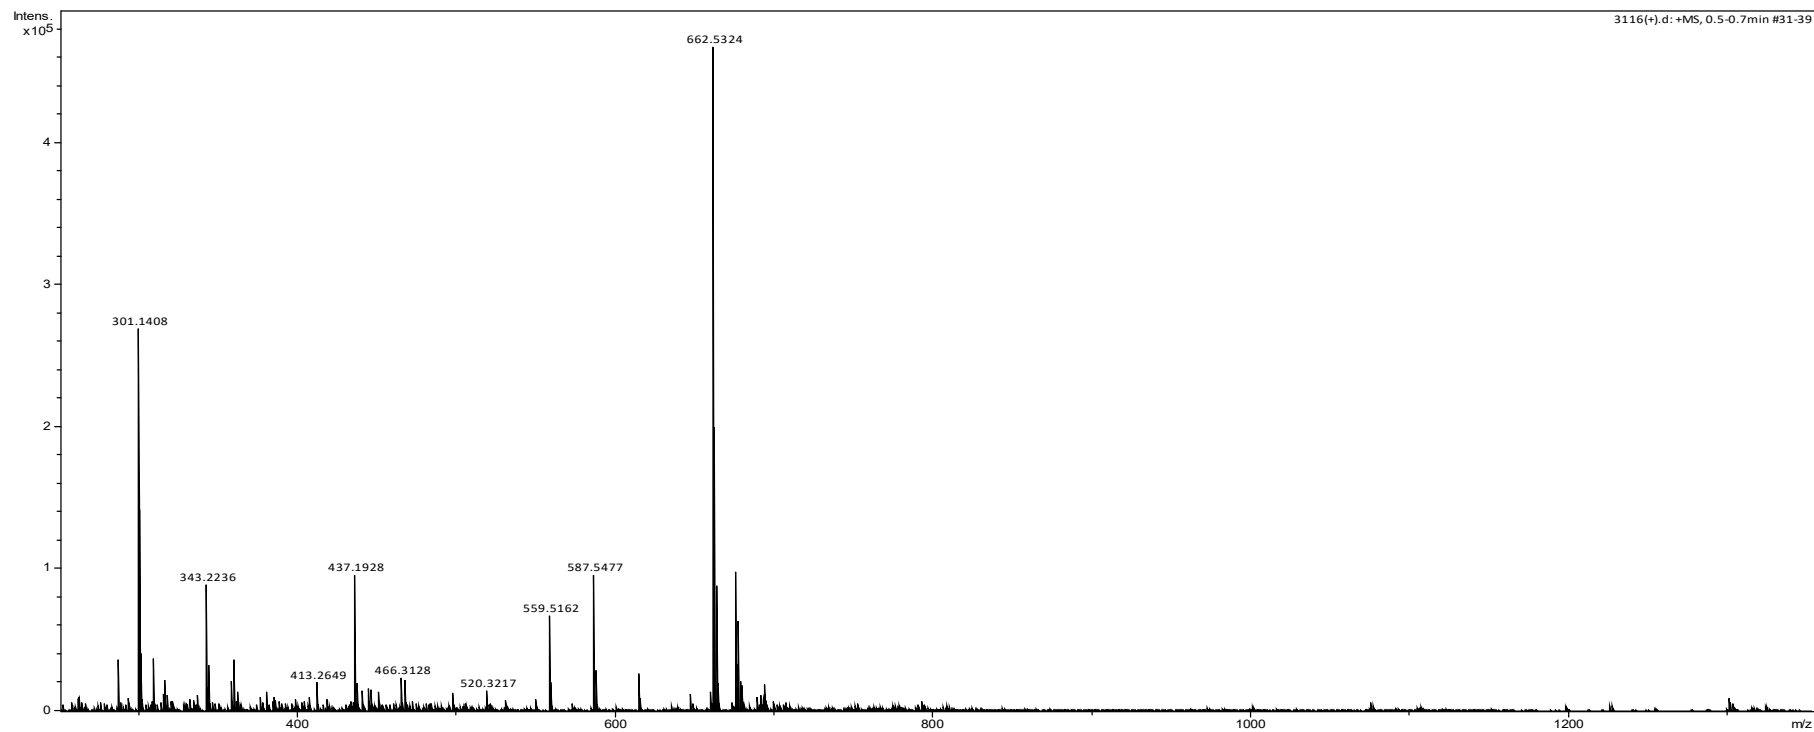

**Figure S11.**  $^1\text{H}$ -NMR spectrum of ceramide **2** in  $\text{C}_5\text{D}_5\text{N}$ .

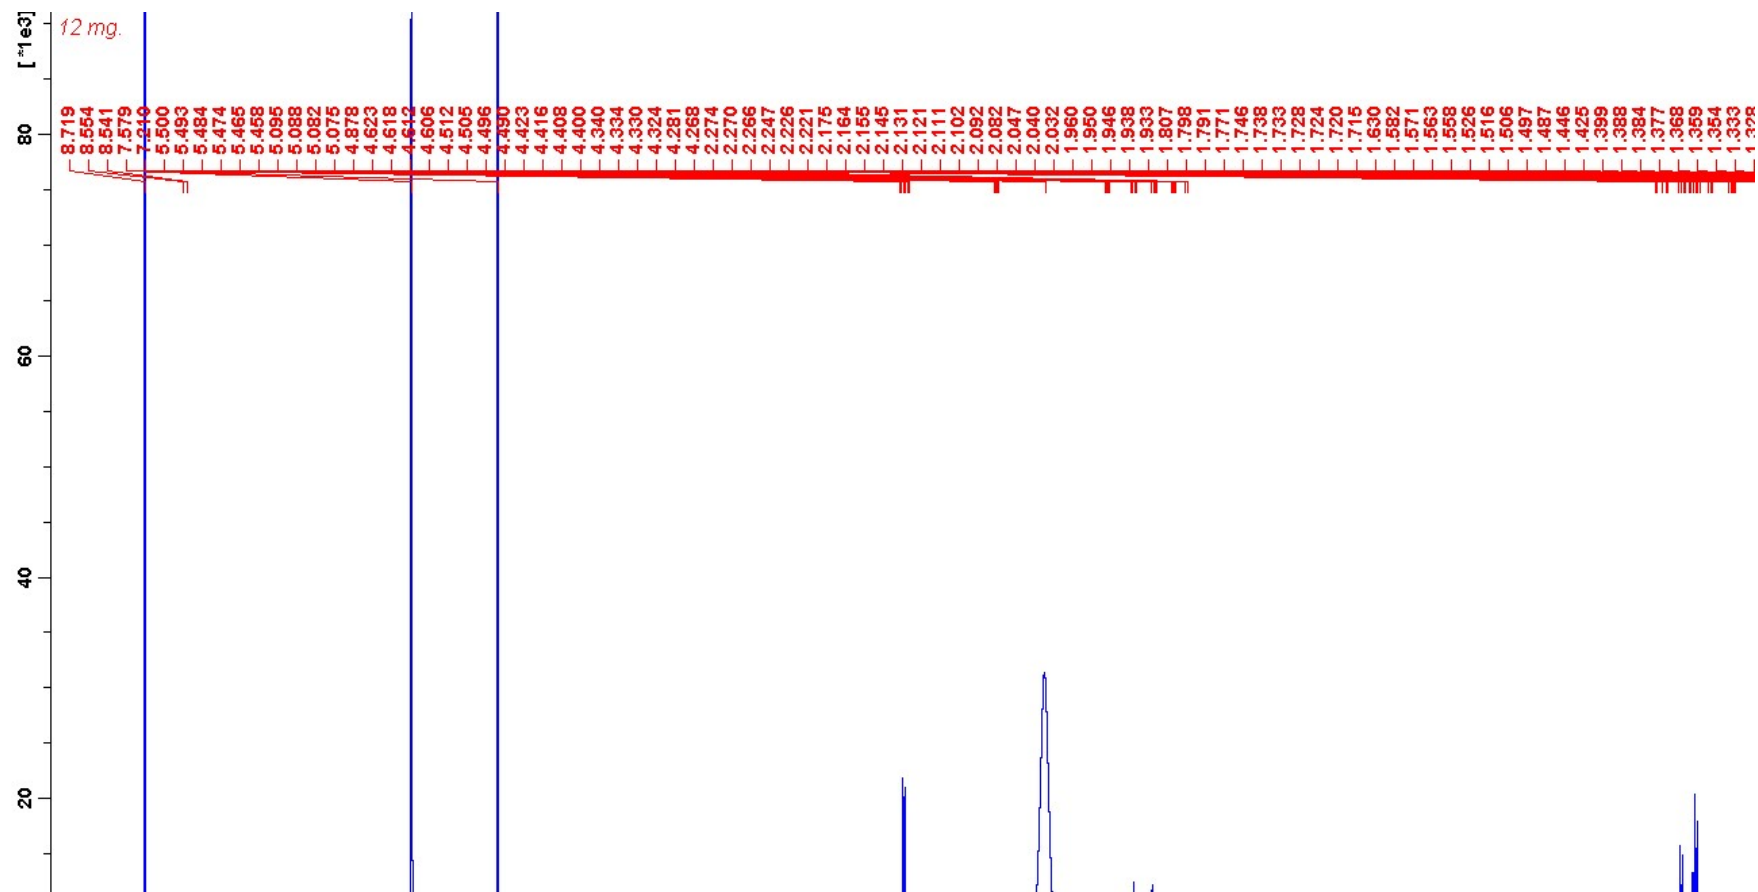

**Figure S12.**  $^{13}\text{C}$ -NMR spectrum of ceramide 2 in  $\text{C}_5\text{D}_5\text{N}$ .

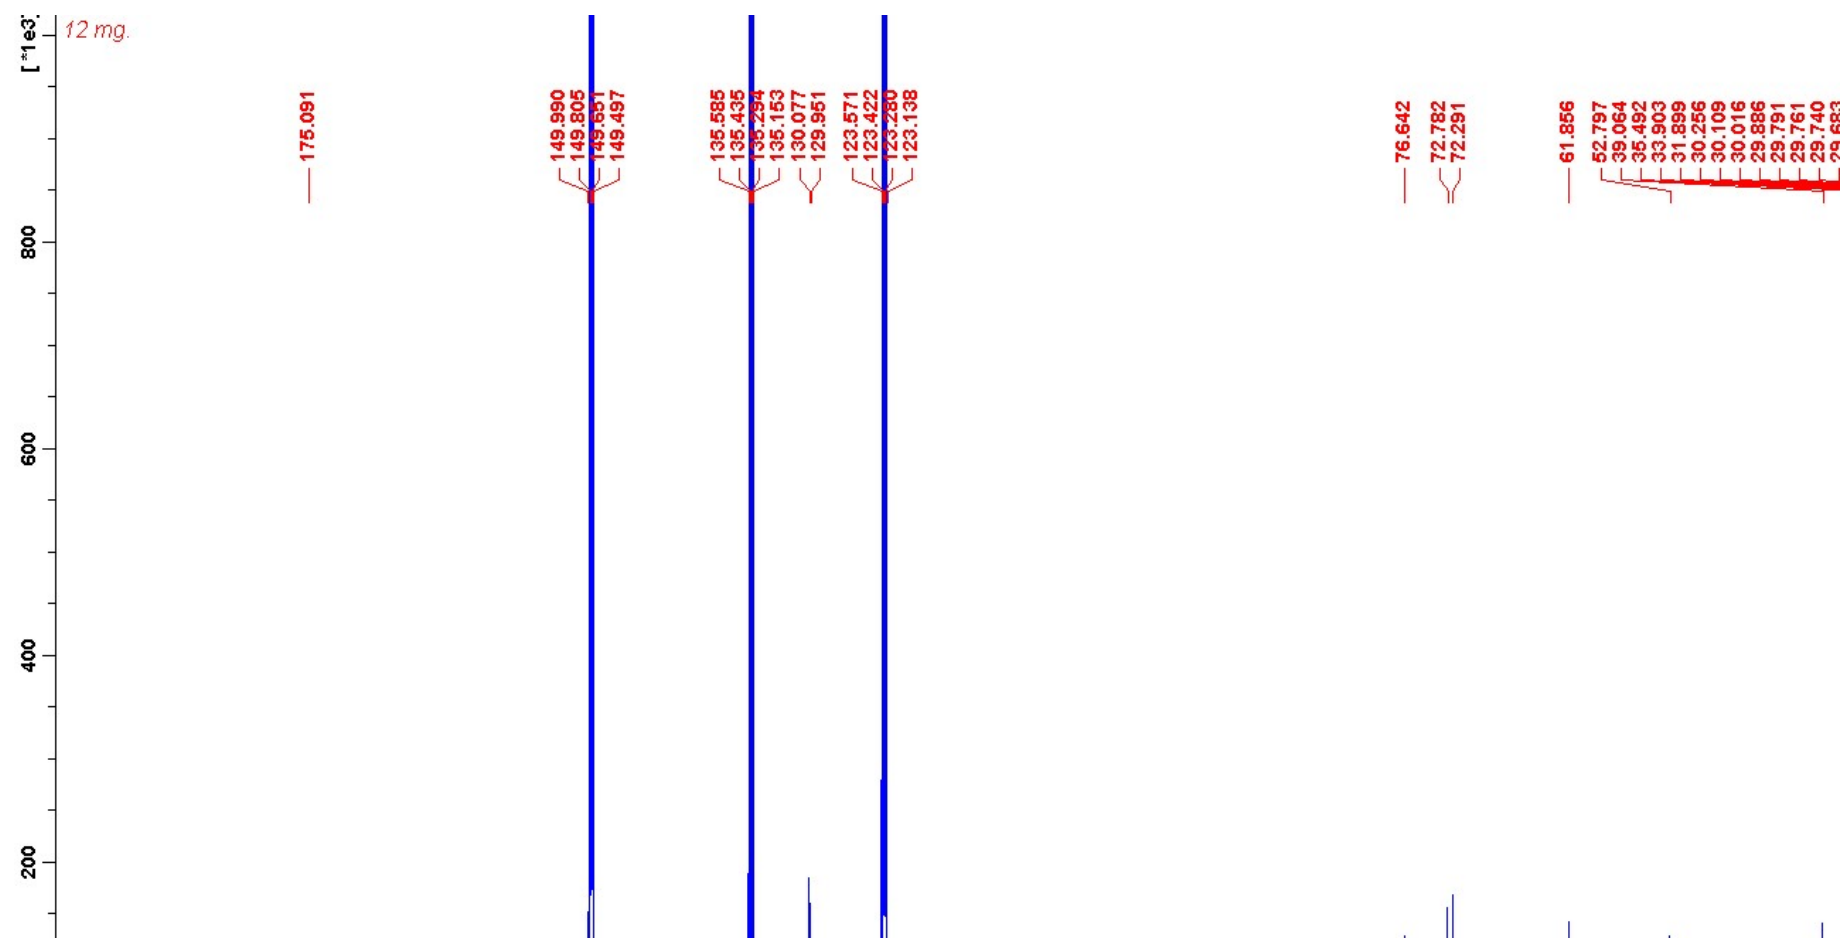

**Figure S13.**  $^1\text{H}$ - $^1\text{H}$ -COSY spectrum of ceramide 2 in  $\text{C}_5\text{D}_5\text{N}$ .

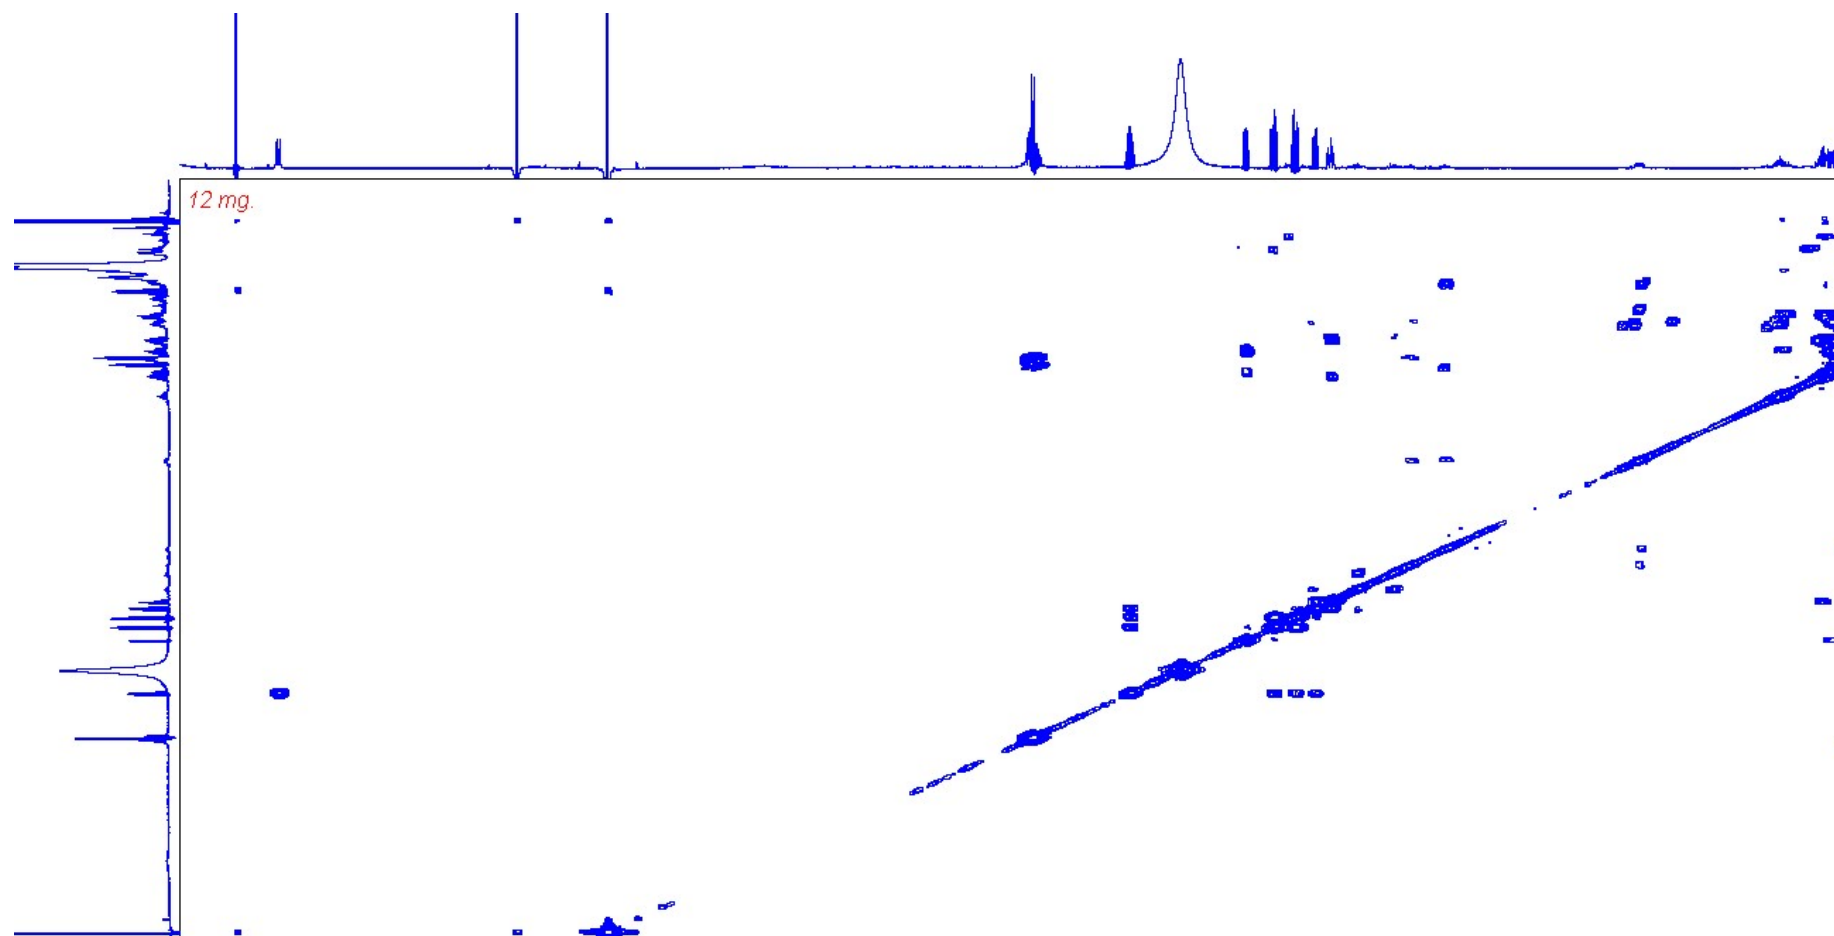



**Figure S14.** HSQC spectrum of ceramide **2** in  $\text{C}_5\text{D}_5\text{N}$ .

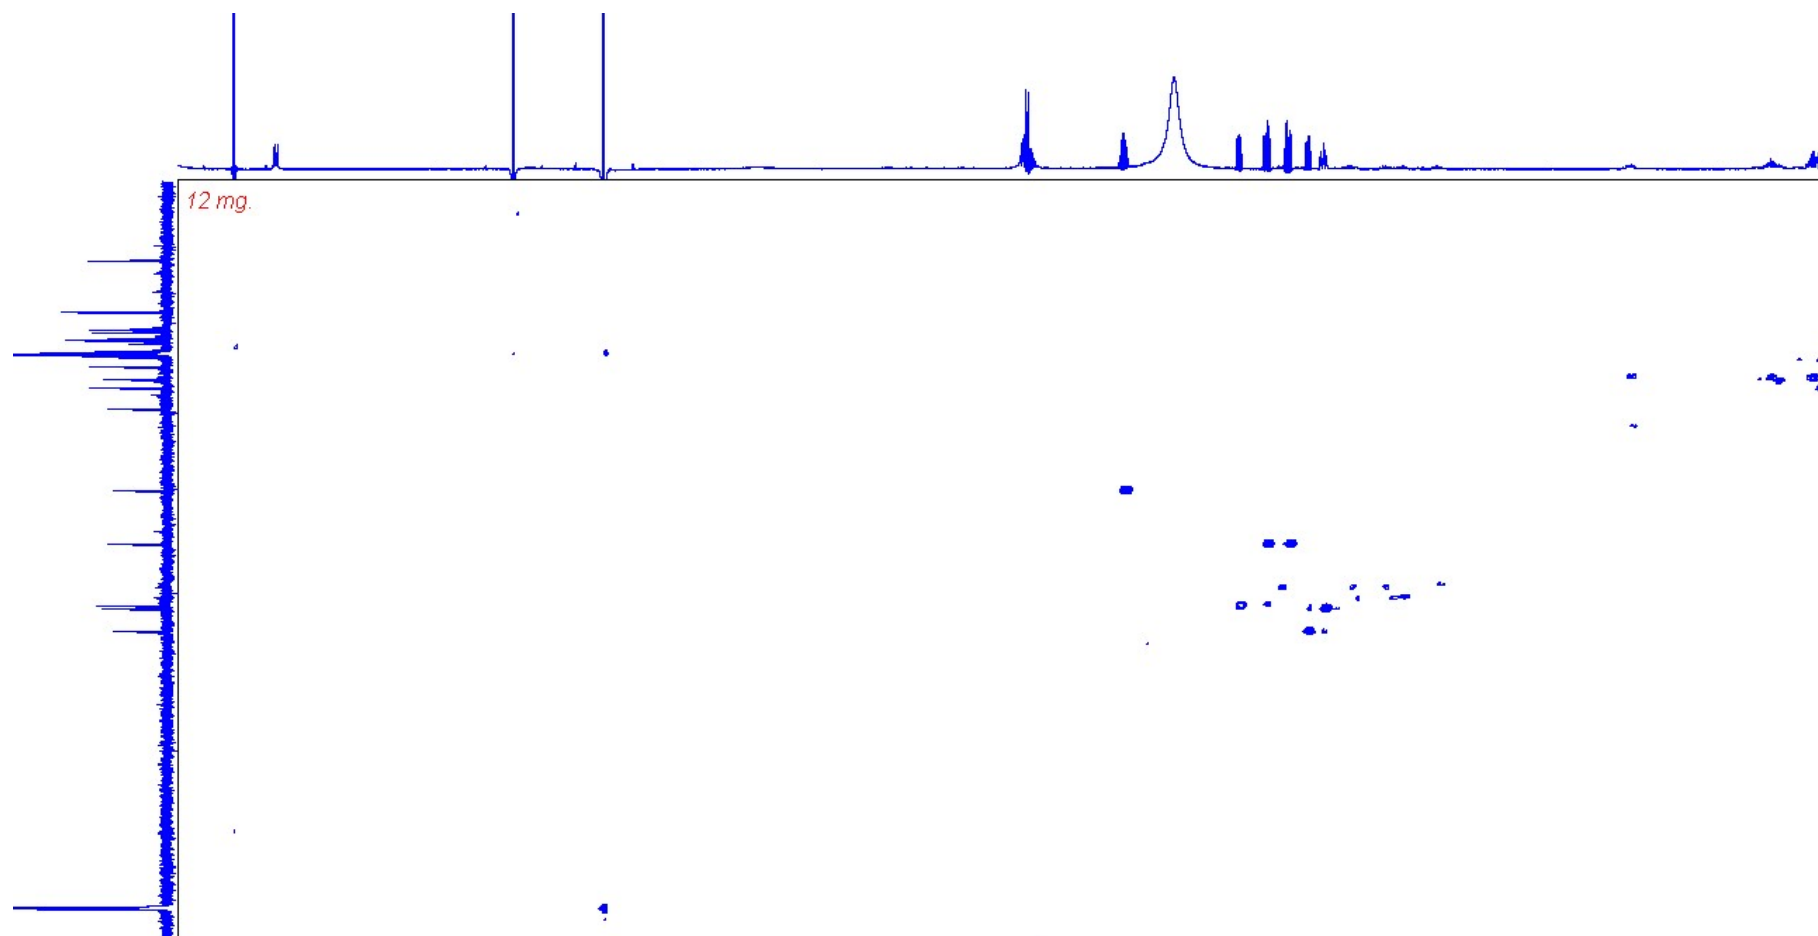

**Figure S15.** HMBC spectrum of ceramide **2** in C<sub>5</sub>D<sub>5</sub>N.

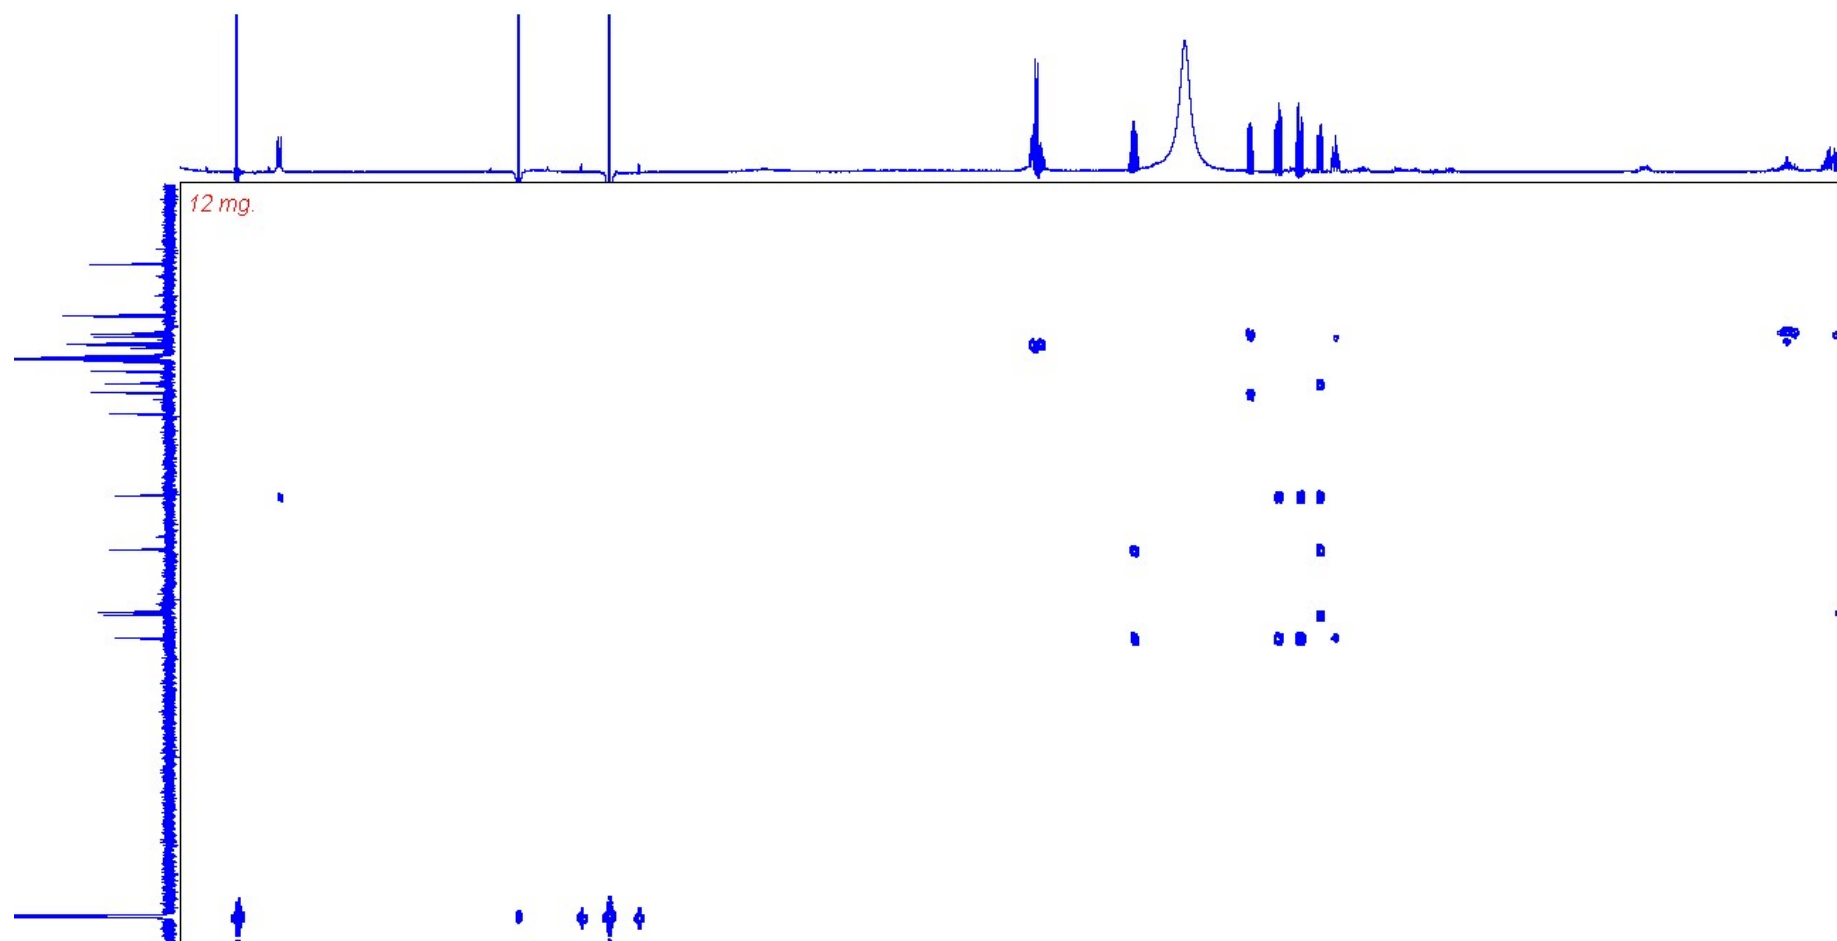

**Figure S16.** (-)-HRESIMS spectrum of ceramide 3.

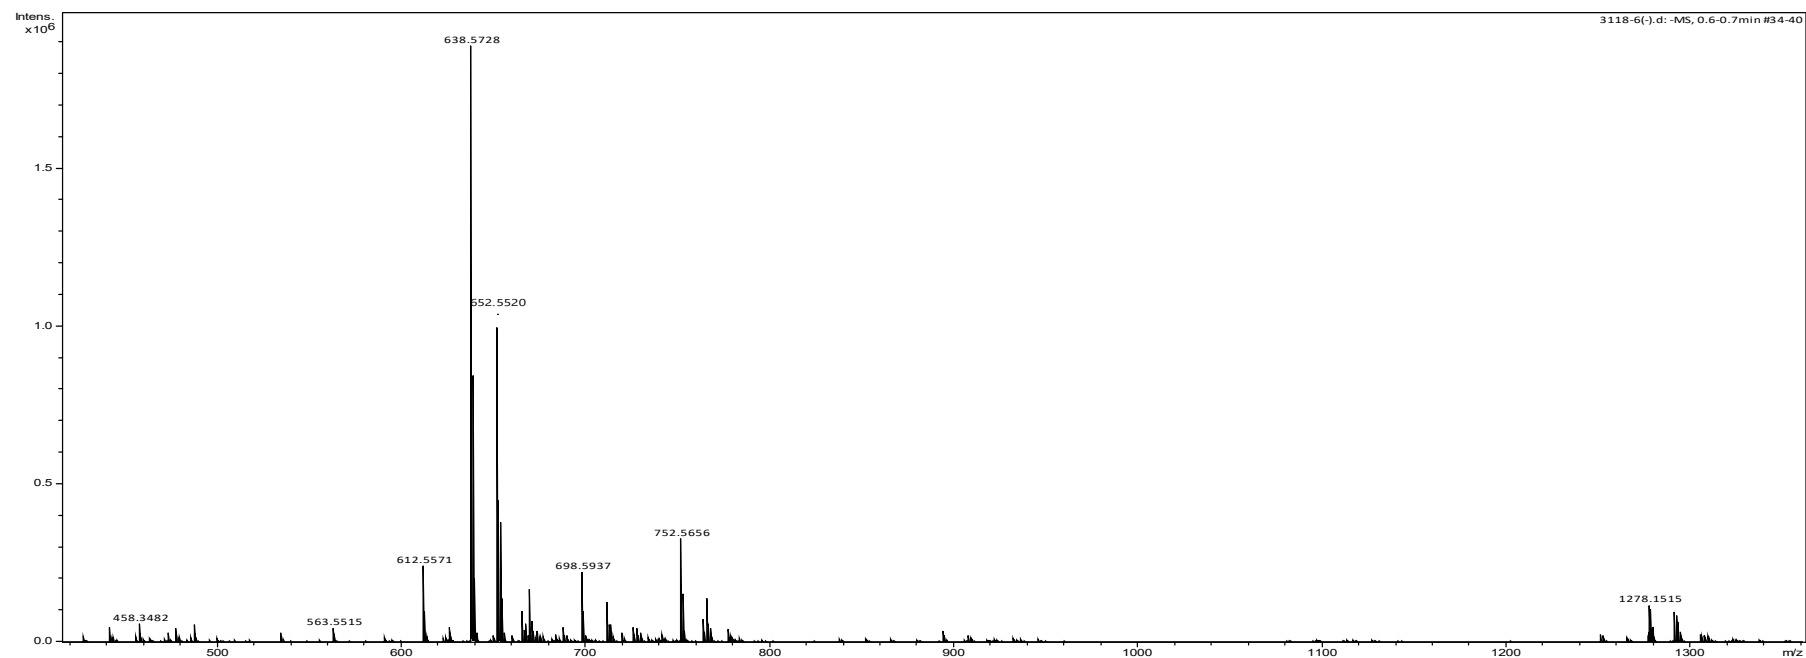

**Figure S17.** (+)-HRESIMS spectrum of ceramide 3.

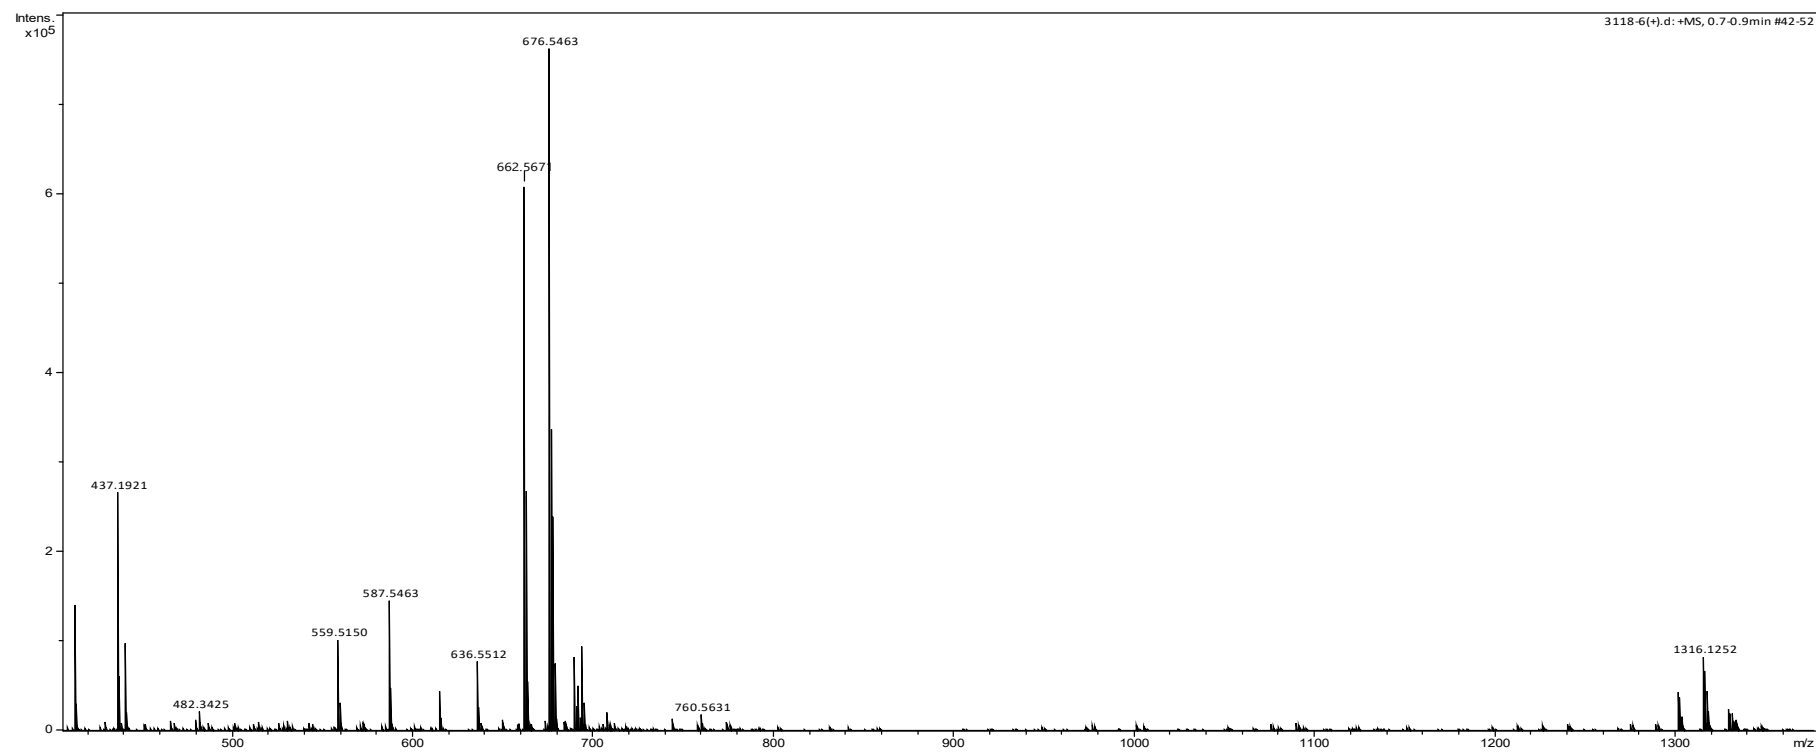

**Figure S18.**  $^1\text{H}$ -NMR spectrum of ceramide **3** in  $\text{C}_5\text{D}_5\text{N}$ .

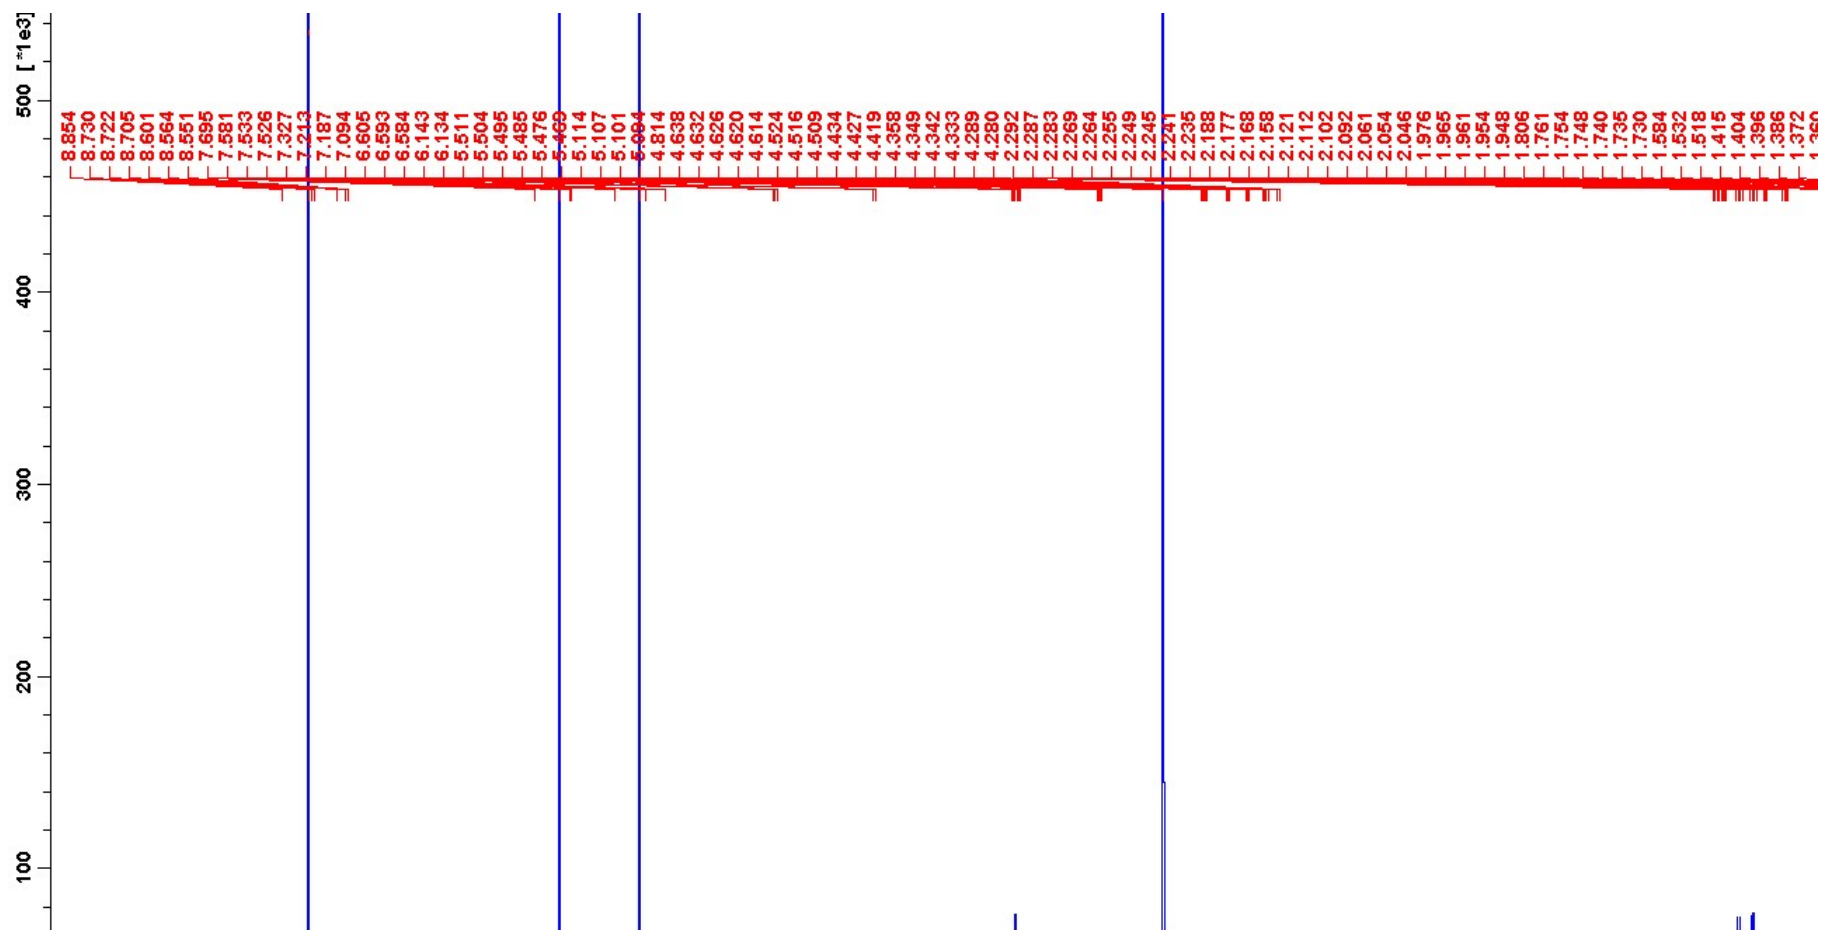

**Figure S19.**  $^{13}\text{C}$ -NMR spectrum of ceramide 3 in  $\text{C}_5\text{D}_5\text{N}$ .

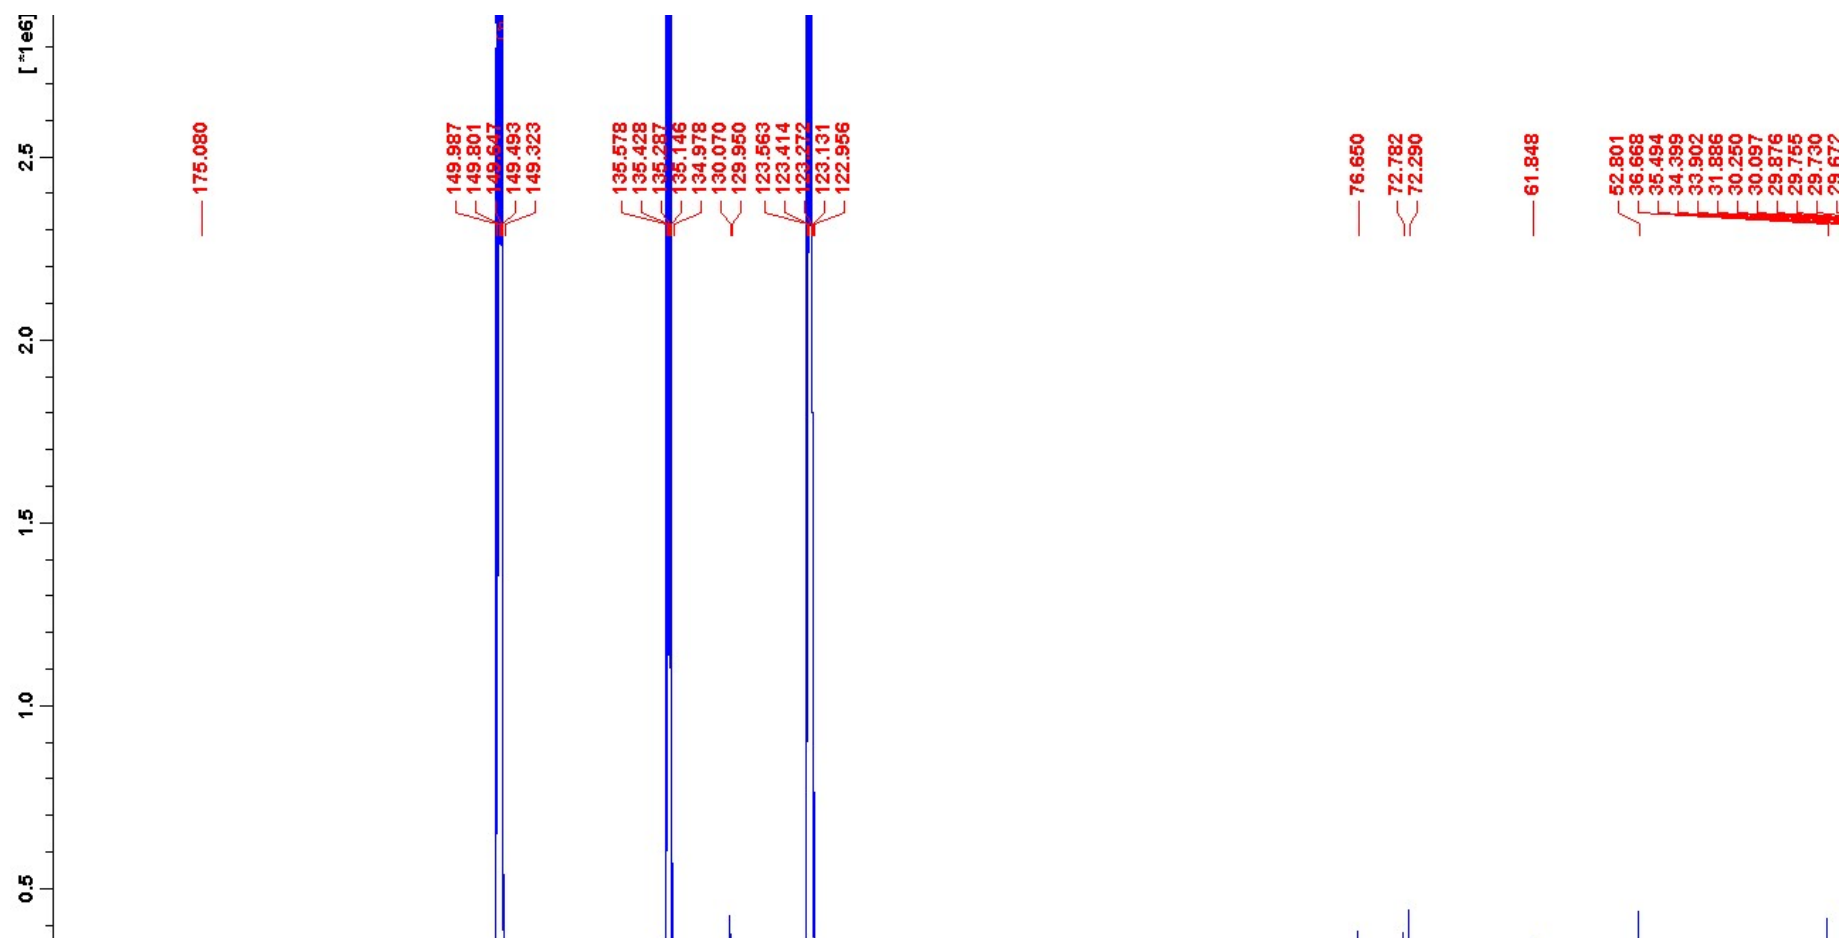

**Figure S20.**  $^1\text{H}$ - $^1\text{H}$ -COSY spectrum of ceramide **3** in  $\text{C}_5\text{D}_5\text{N}$ .

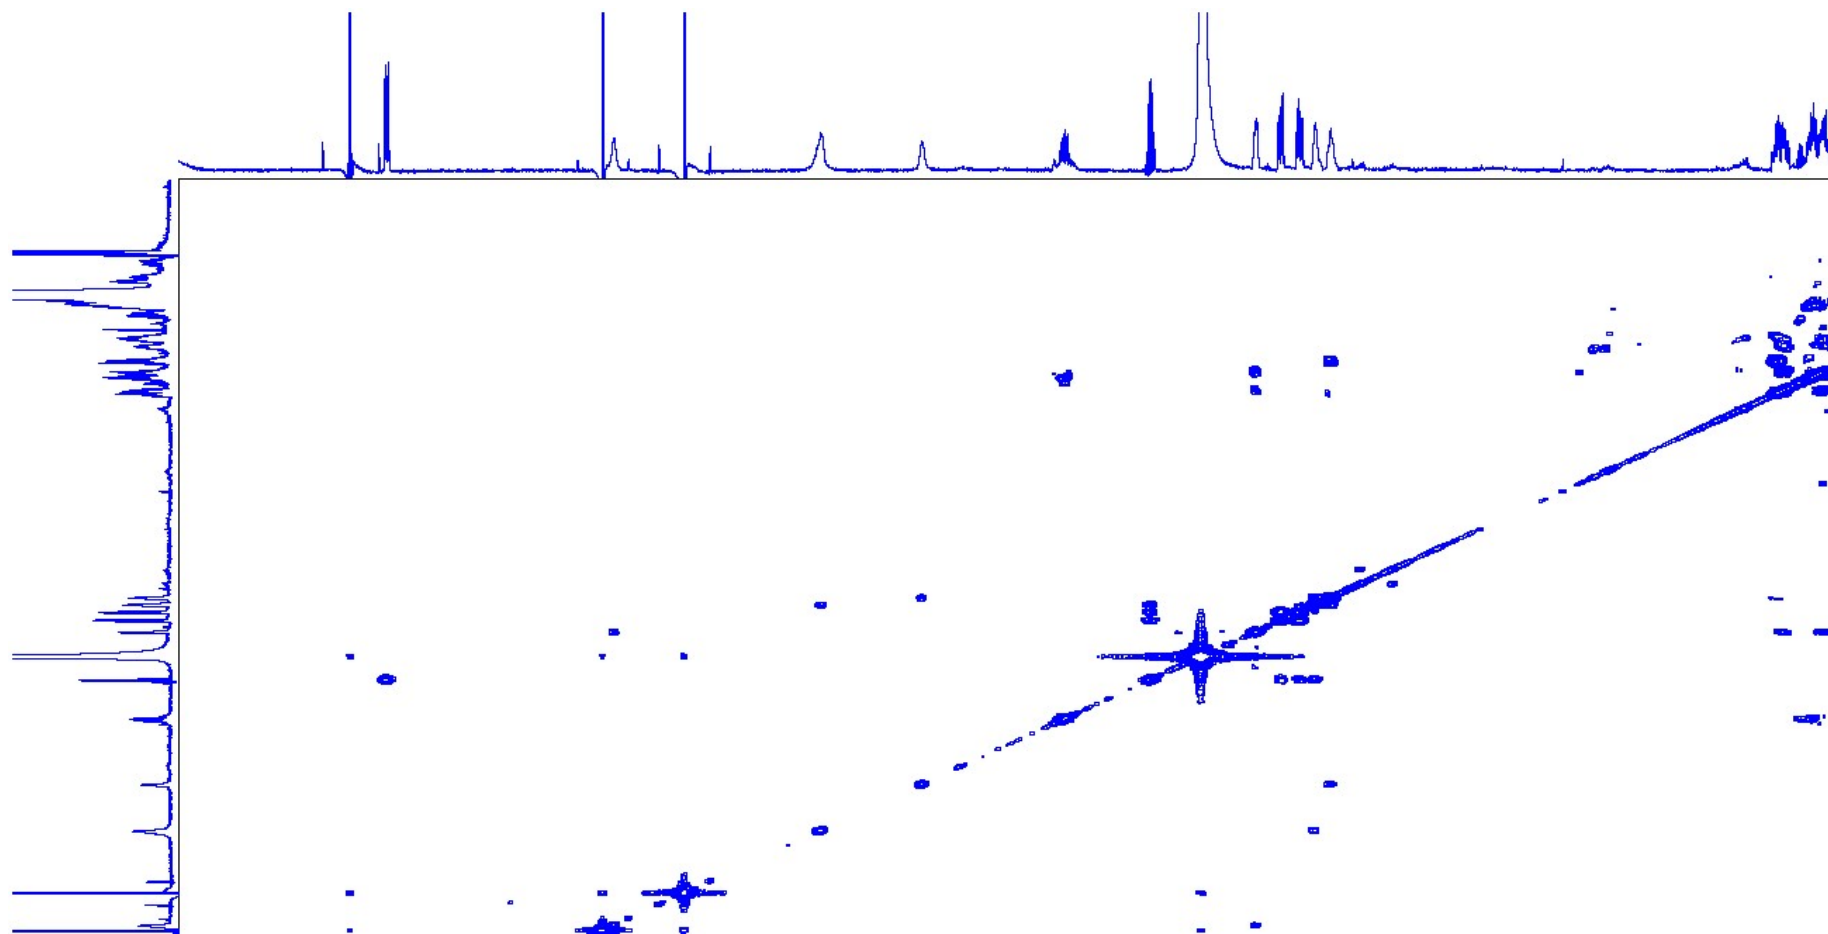

**Figure S21.** HSQC spectrum of ceramide **3** in C<sub>5</sub>D<sub>5</sub>N.

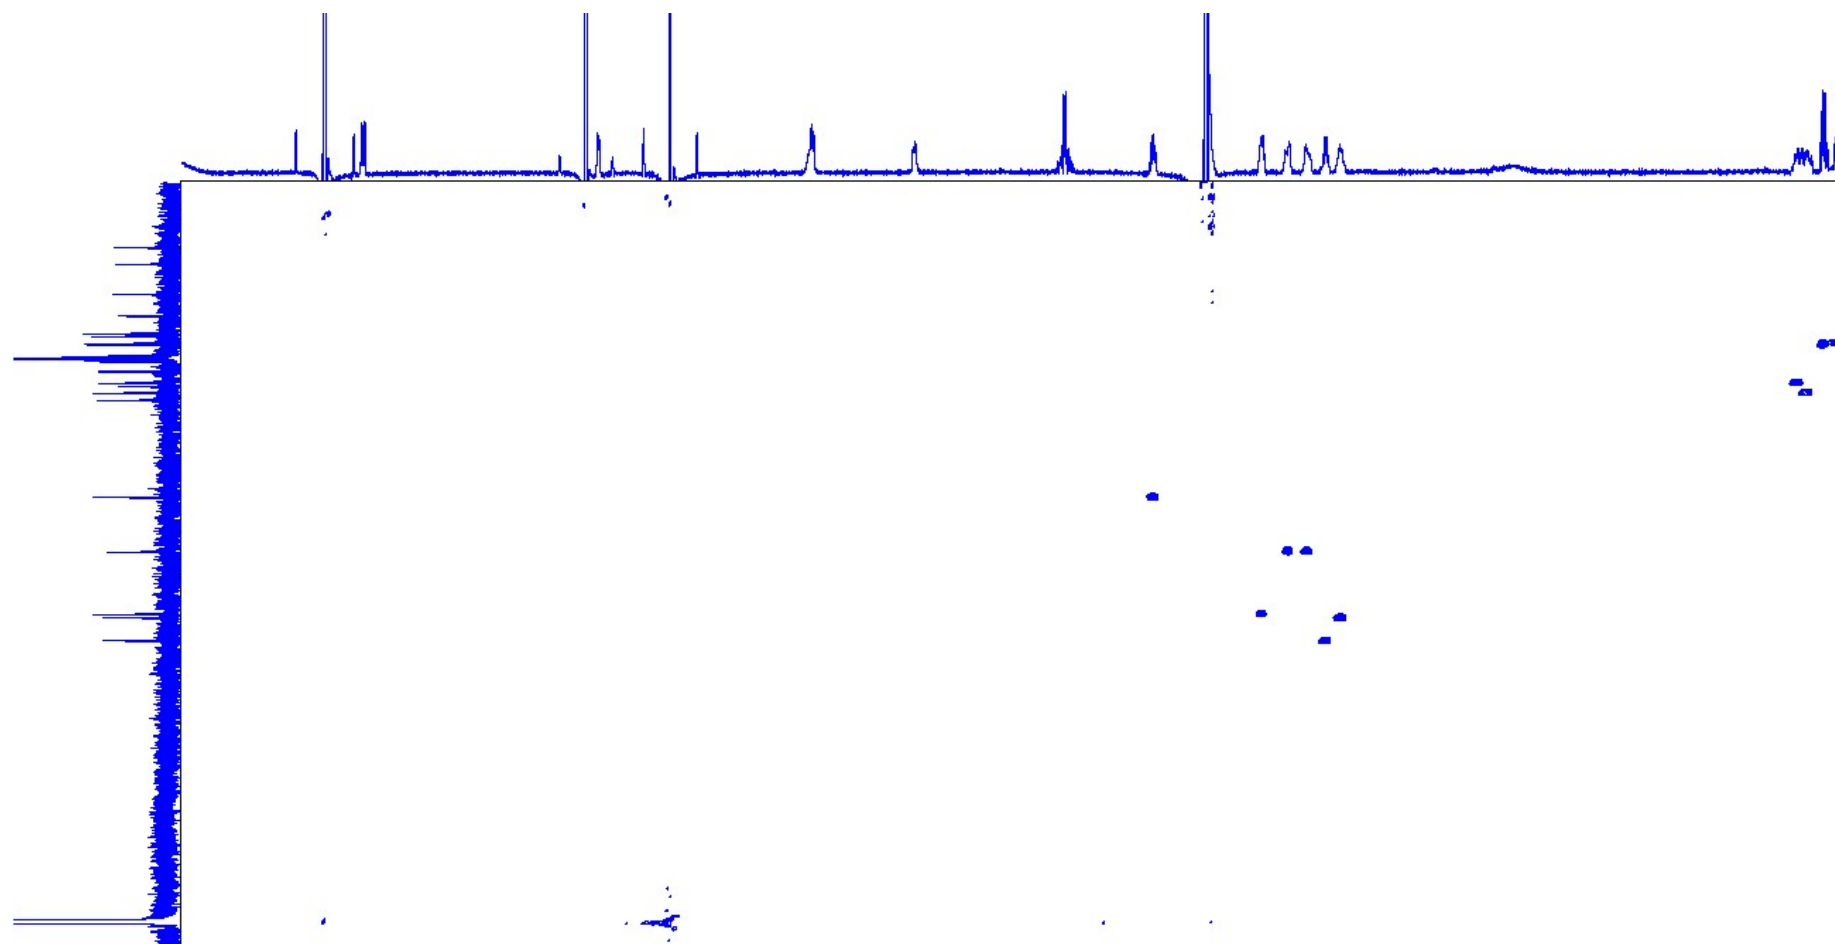



**Figure S22.** HMBC spectrum of ceramide **3** in C<sub>5</sub>D<sub>5</sub>N.

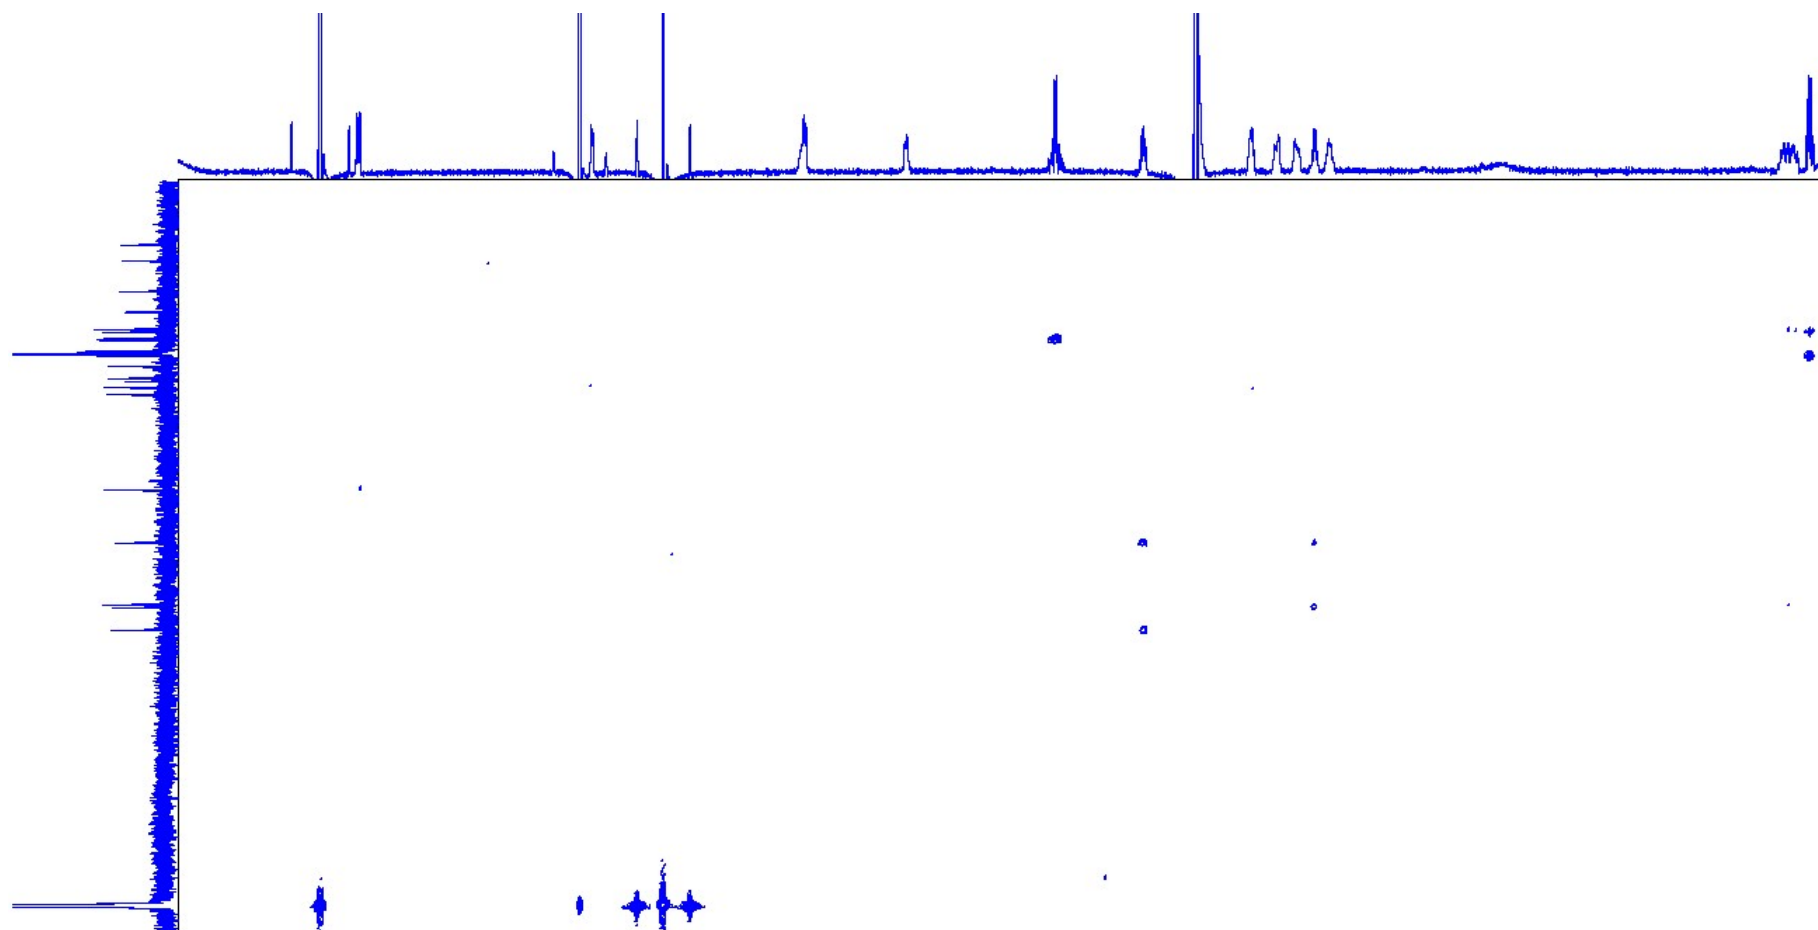

**Figure S23.** (-)-HRESIMS spectrum of cerebroside **4**.

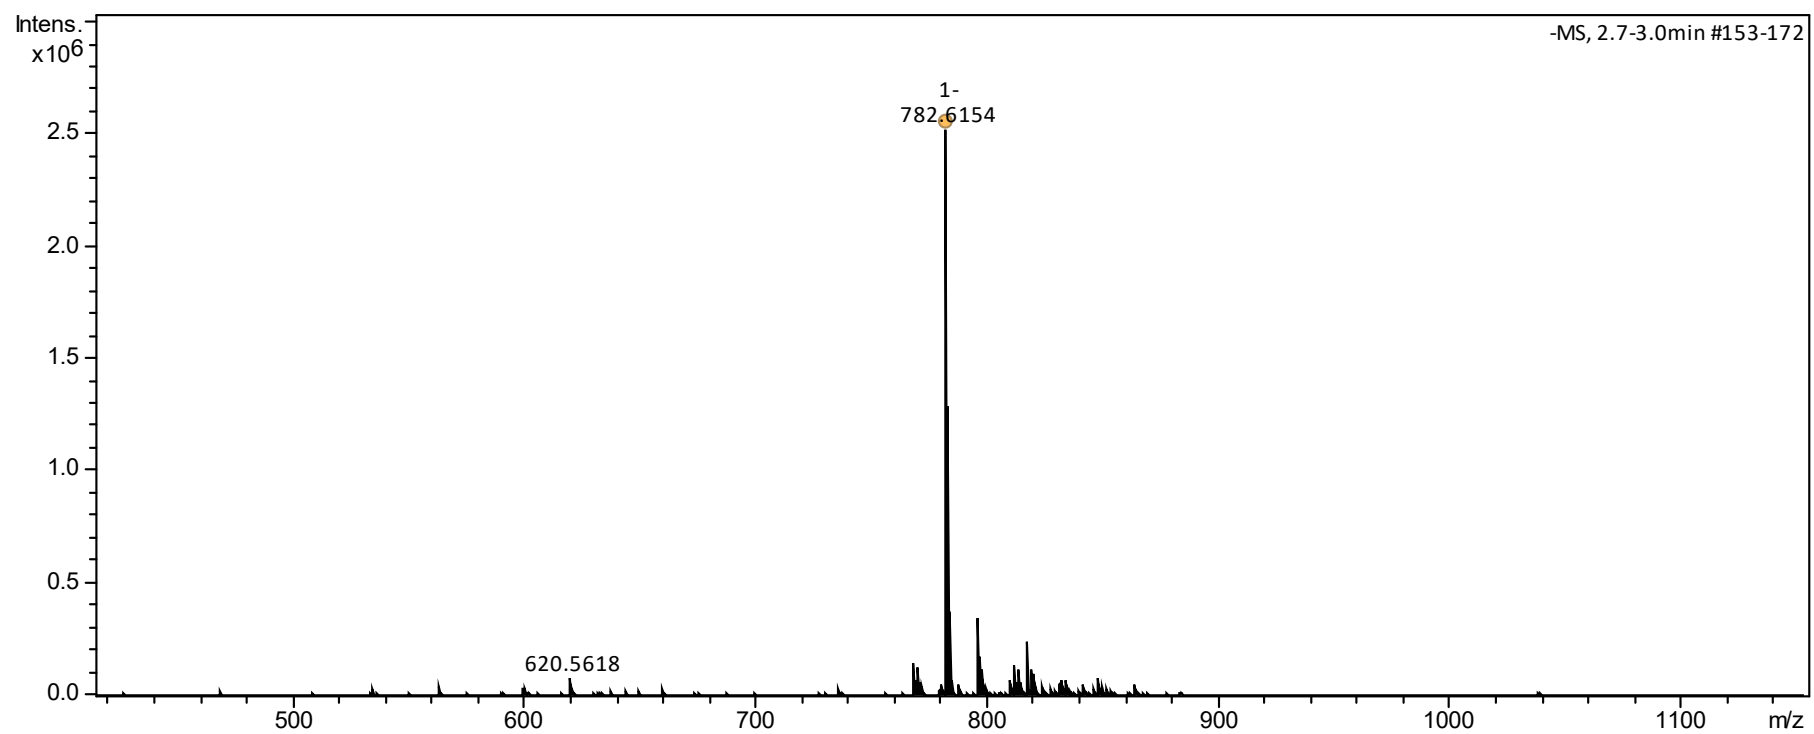

**Figure S24.** (+)-HRESIMS spectrum of cerebroside **4**.

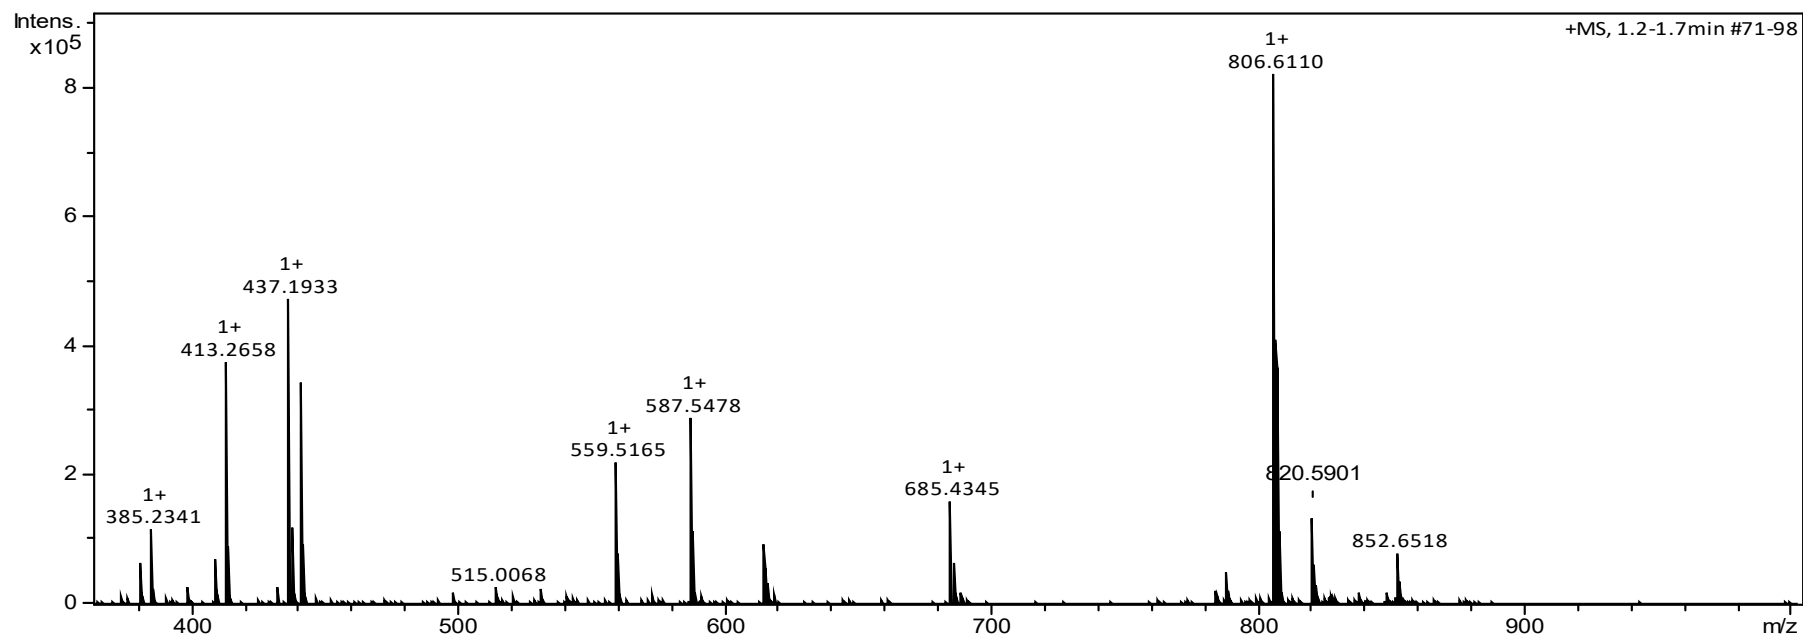

**Figure S25.**  $^1\text{H}$ -NMR spectrum of cerebroside **4** in  $\text{C}_5\text{D}_5\text{N}$ .

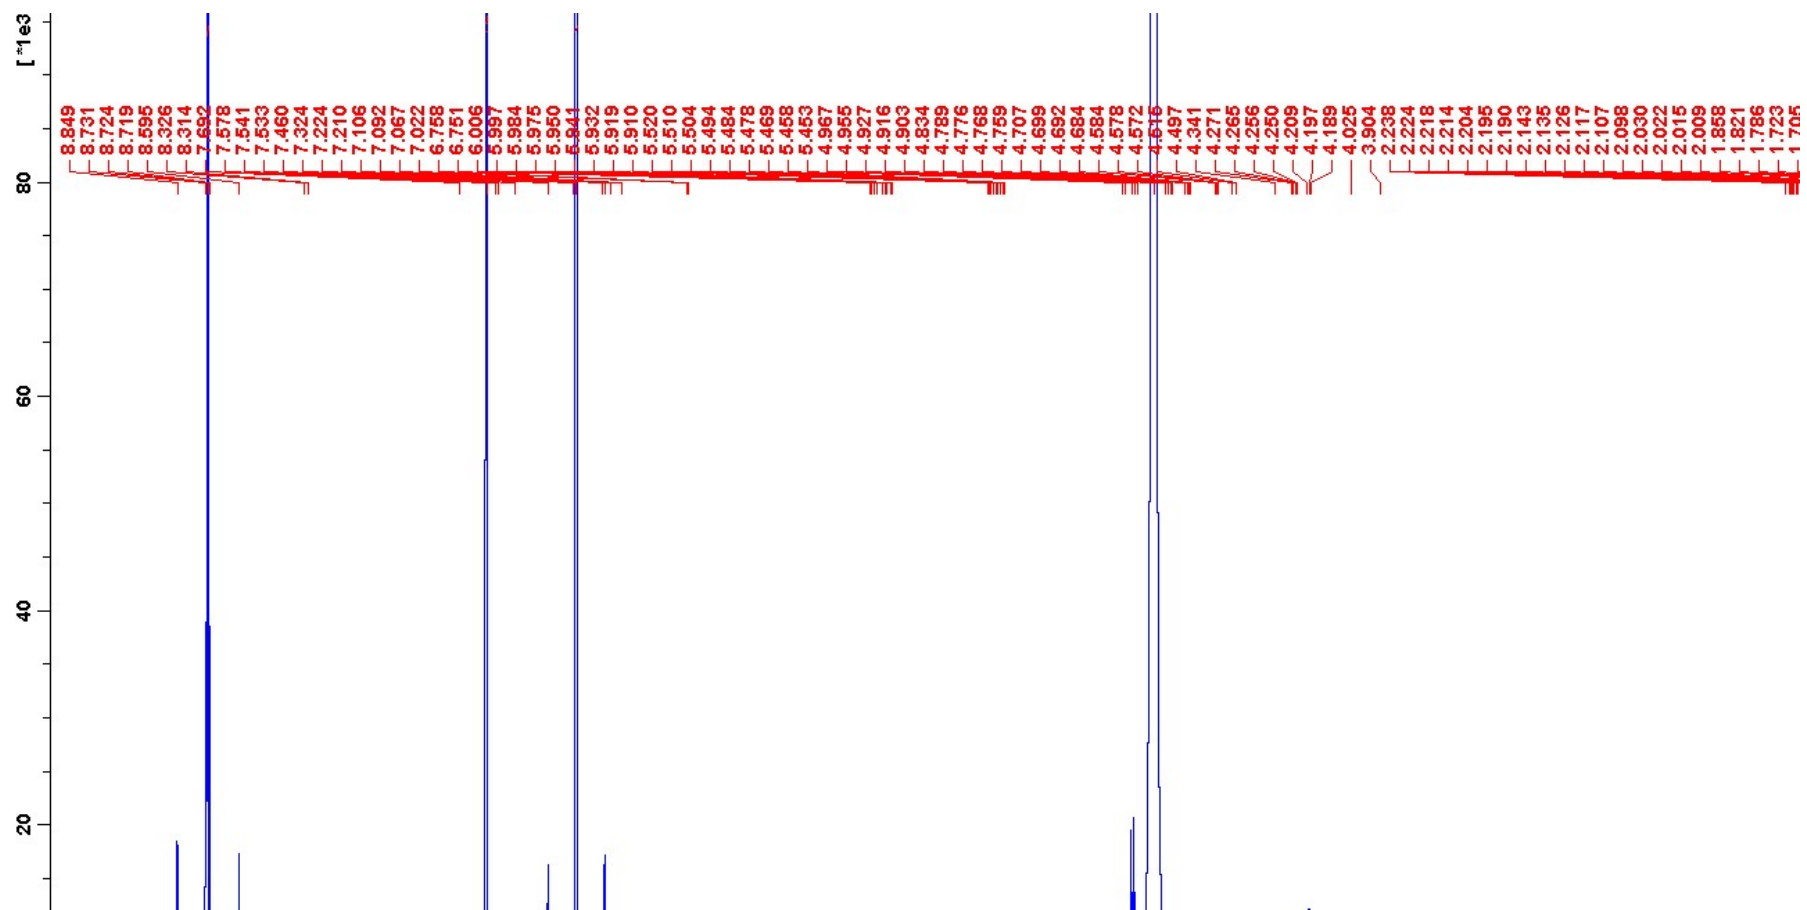

**Figure S26.**  $^{13}\text{C}$ -NMR spectrum of cerebroside **4** in  $\text{C}_5\text{D}_5\text{N}$ .

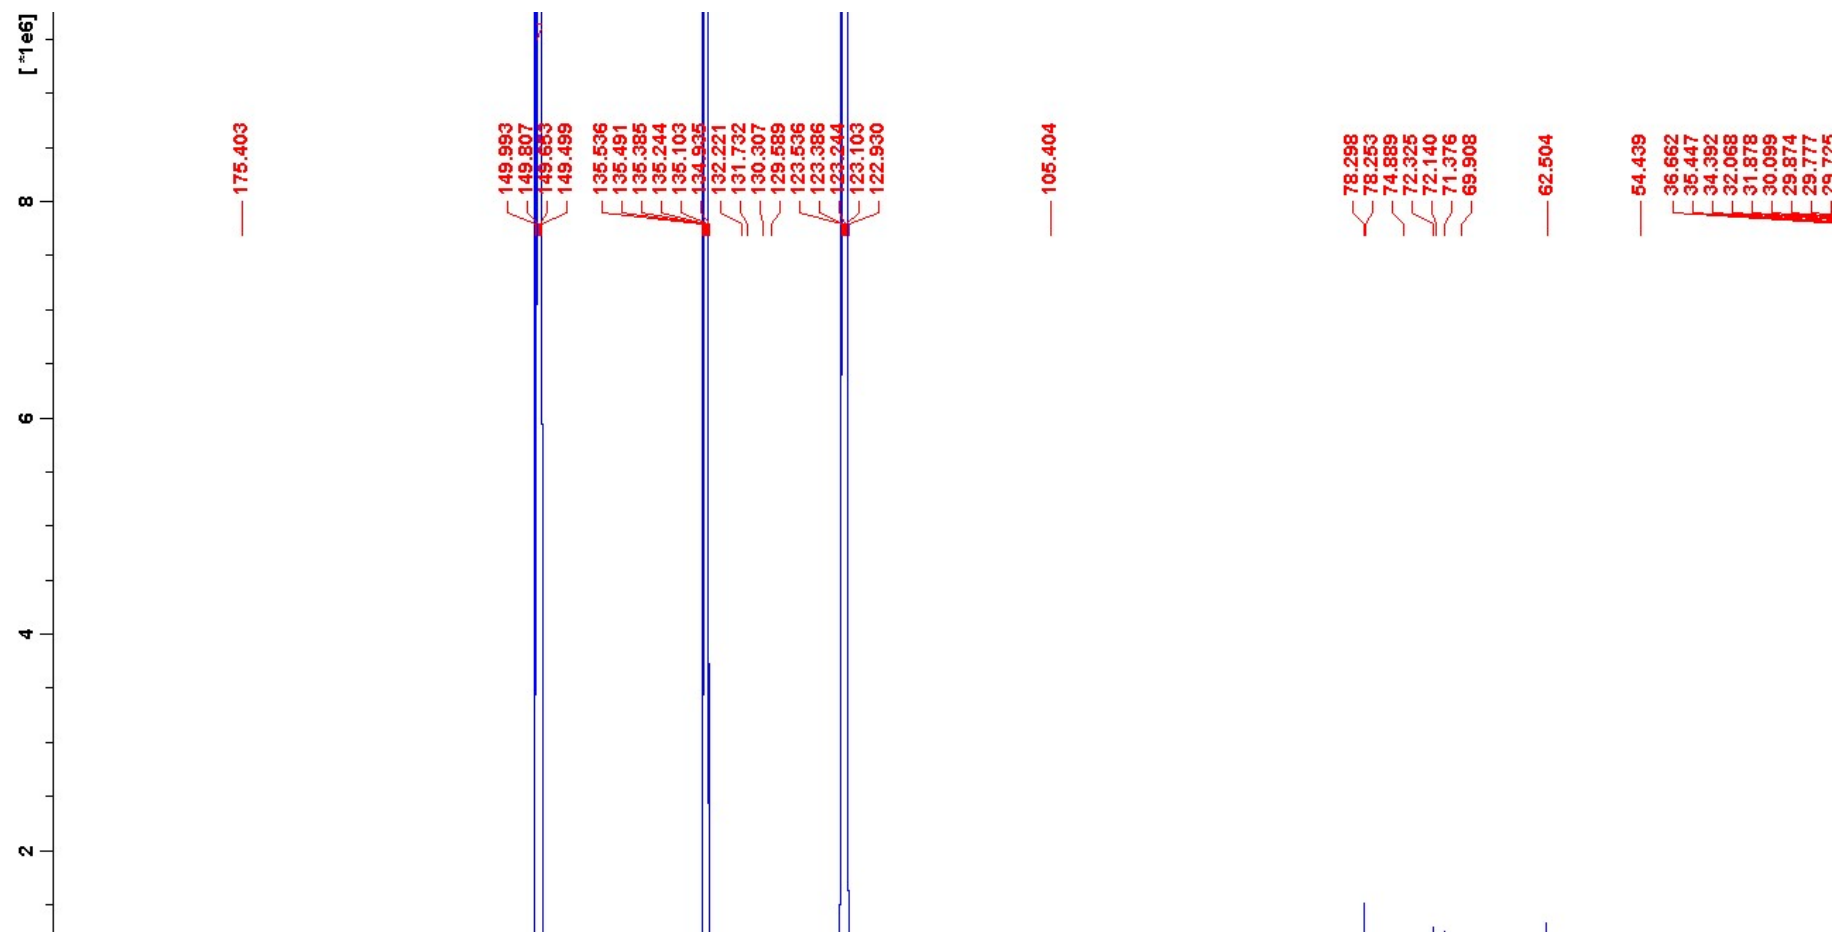

**Figure S27.**  $^1\text{H}$ - $^1\text{H}$ -COSY spectrum of cerebroside 4 in  $\text{C}_5\text{D}_5\text{N}$ .

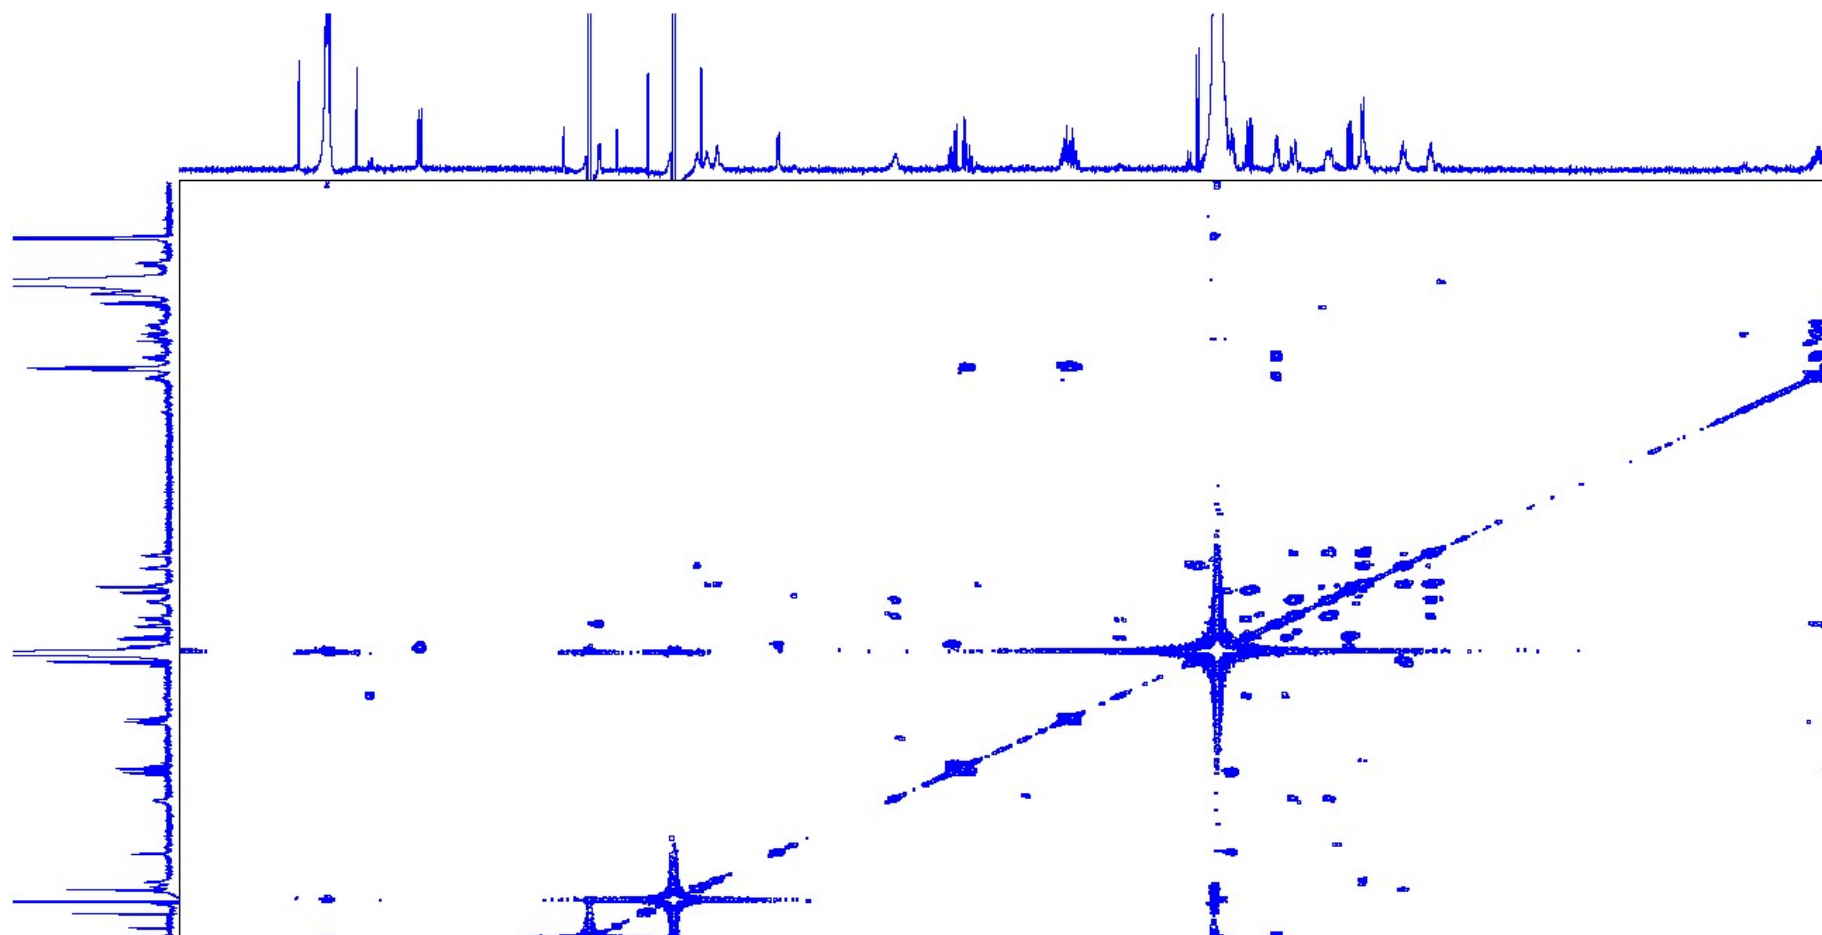

**Figure S28.** HSQC spectrum of cerebroside **4** in C<sub>5</sub>D<sub>5</sub>N.

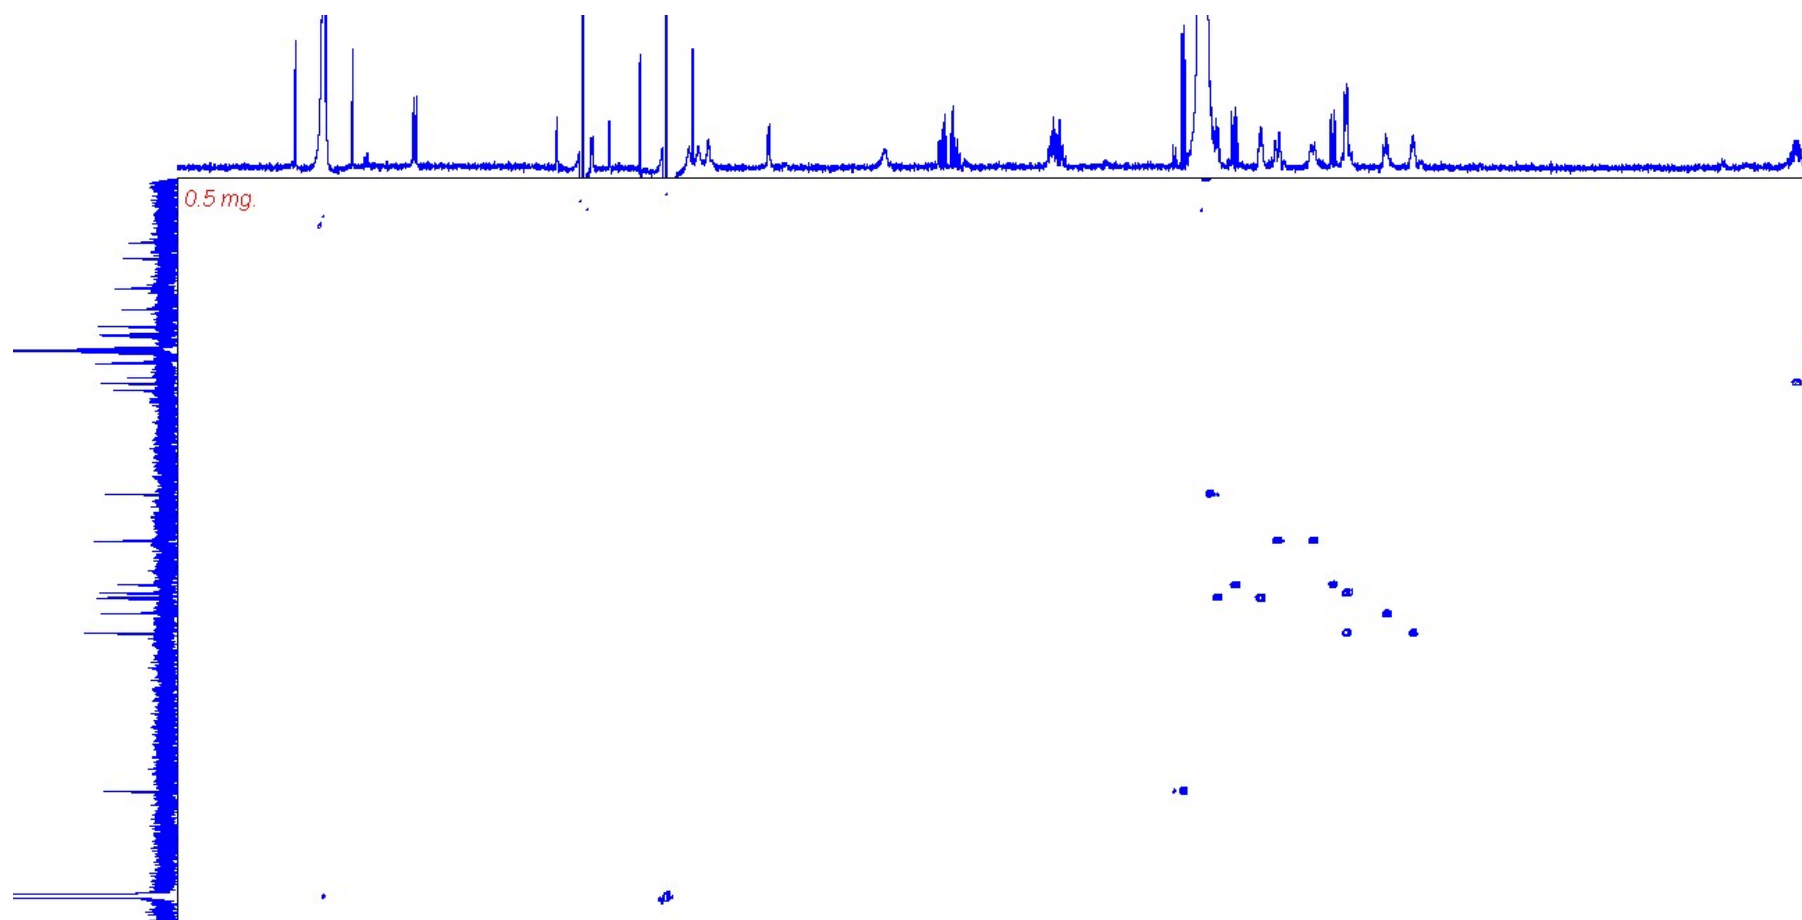

**Figure S29.** HMBC spectrum of cerebroside **4** in C<sub>5</sub>D<sub>5</sub>N.

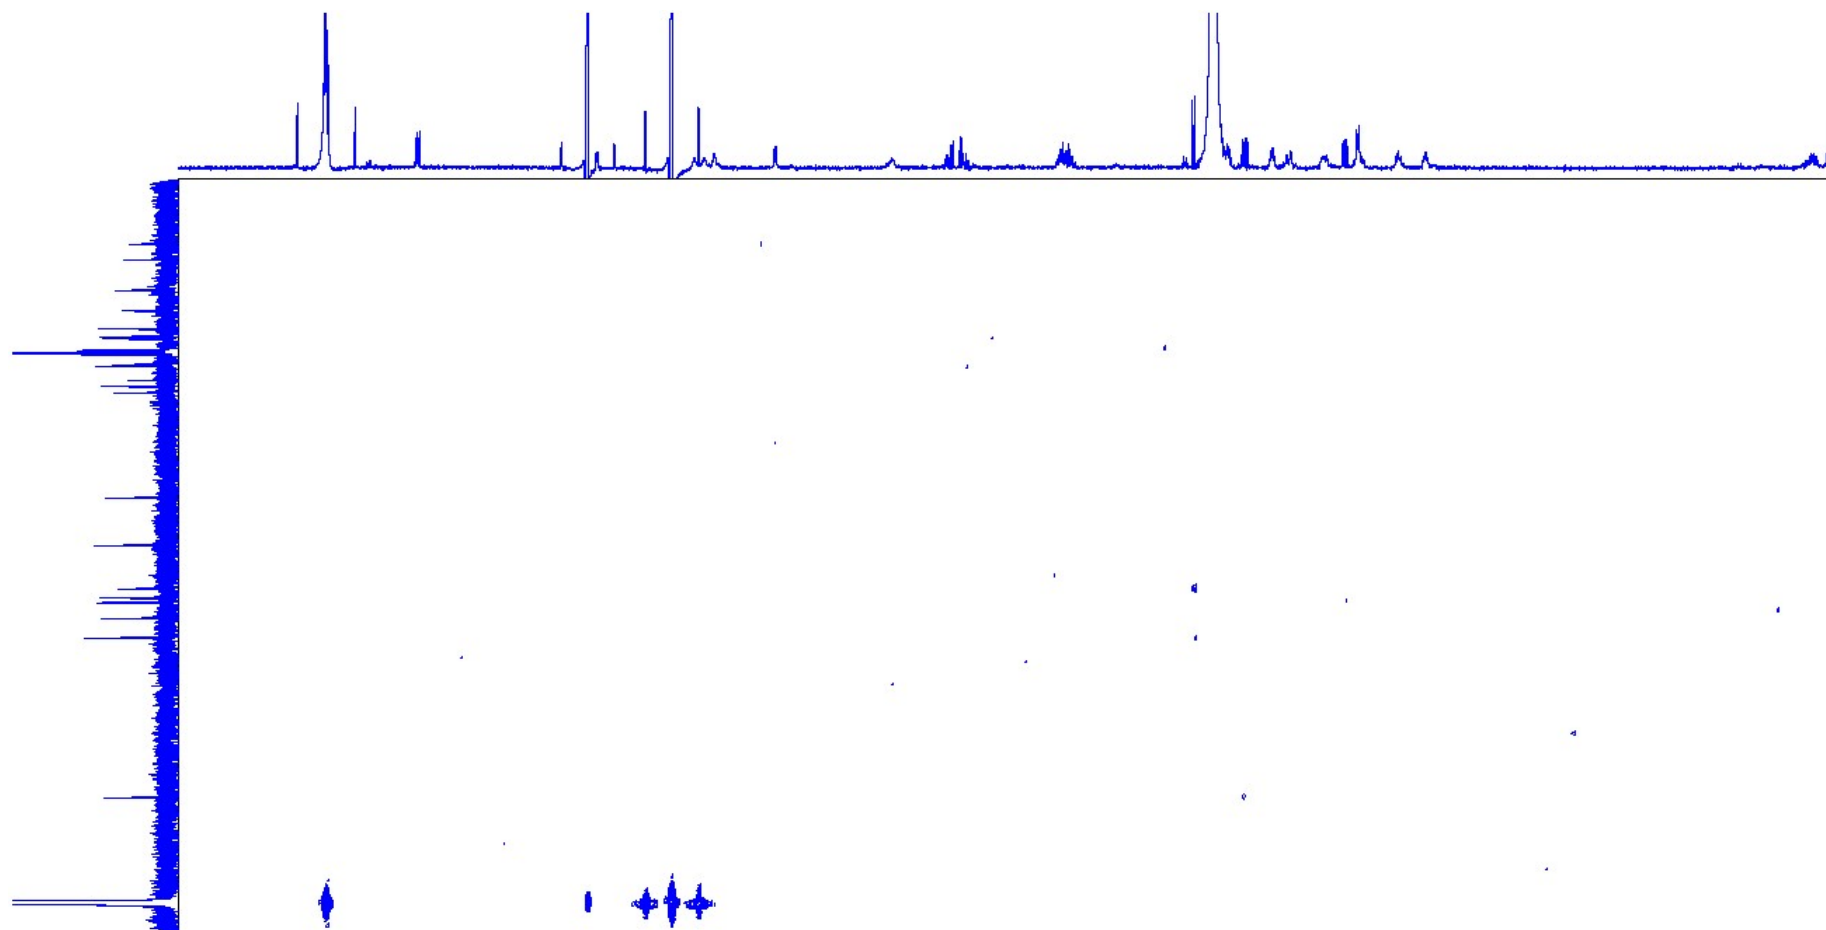



**Figure S30.** (-)-HRESIMS spectrum of cerebroside 8.

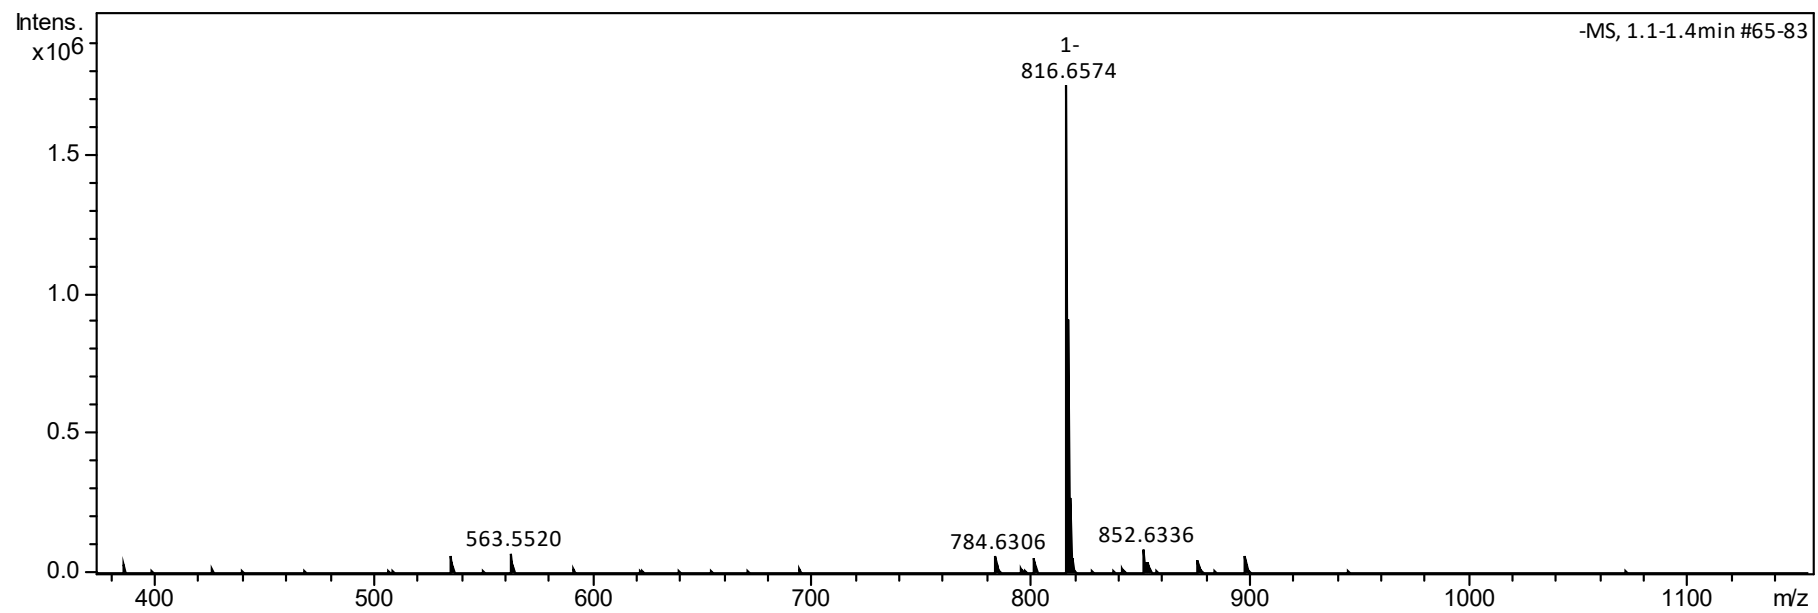

**Figure S31.** (+)-HRESIMS spectrum of cerebroside 8.

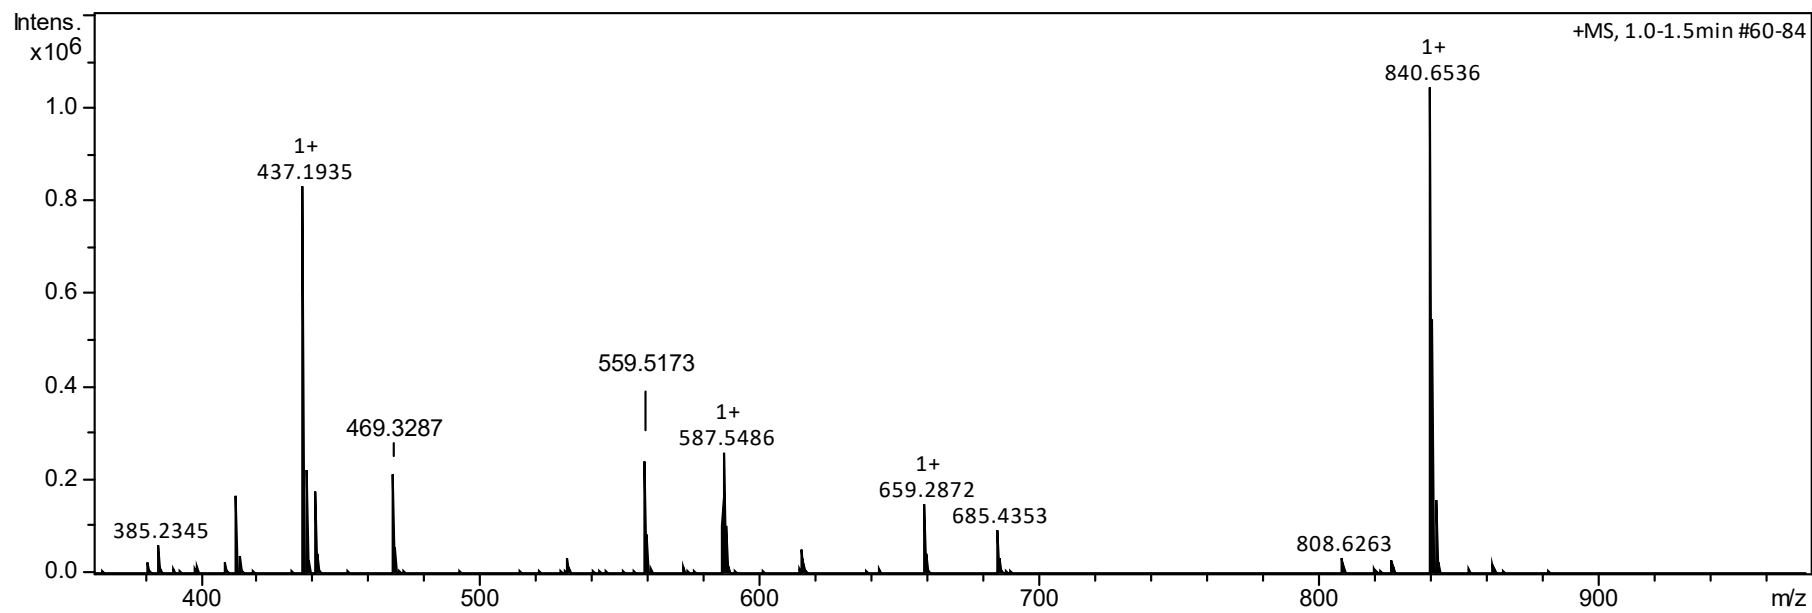

Figure S32.  $^1\text{H}$ -NMR spectrum of cerebroside 8 in  $\text{C}_5\text{D}_5\text{N}$ .

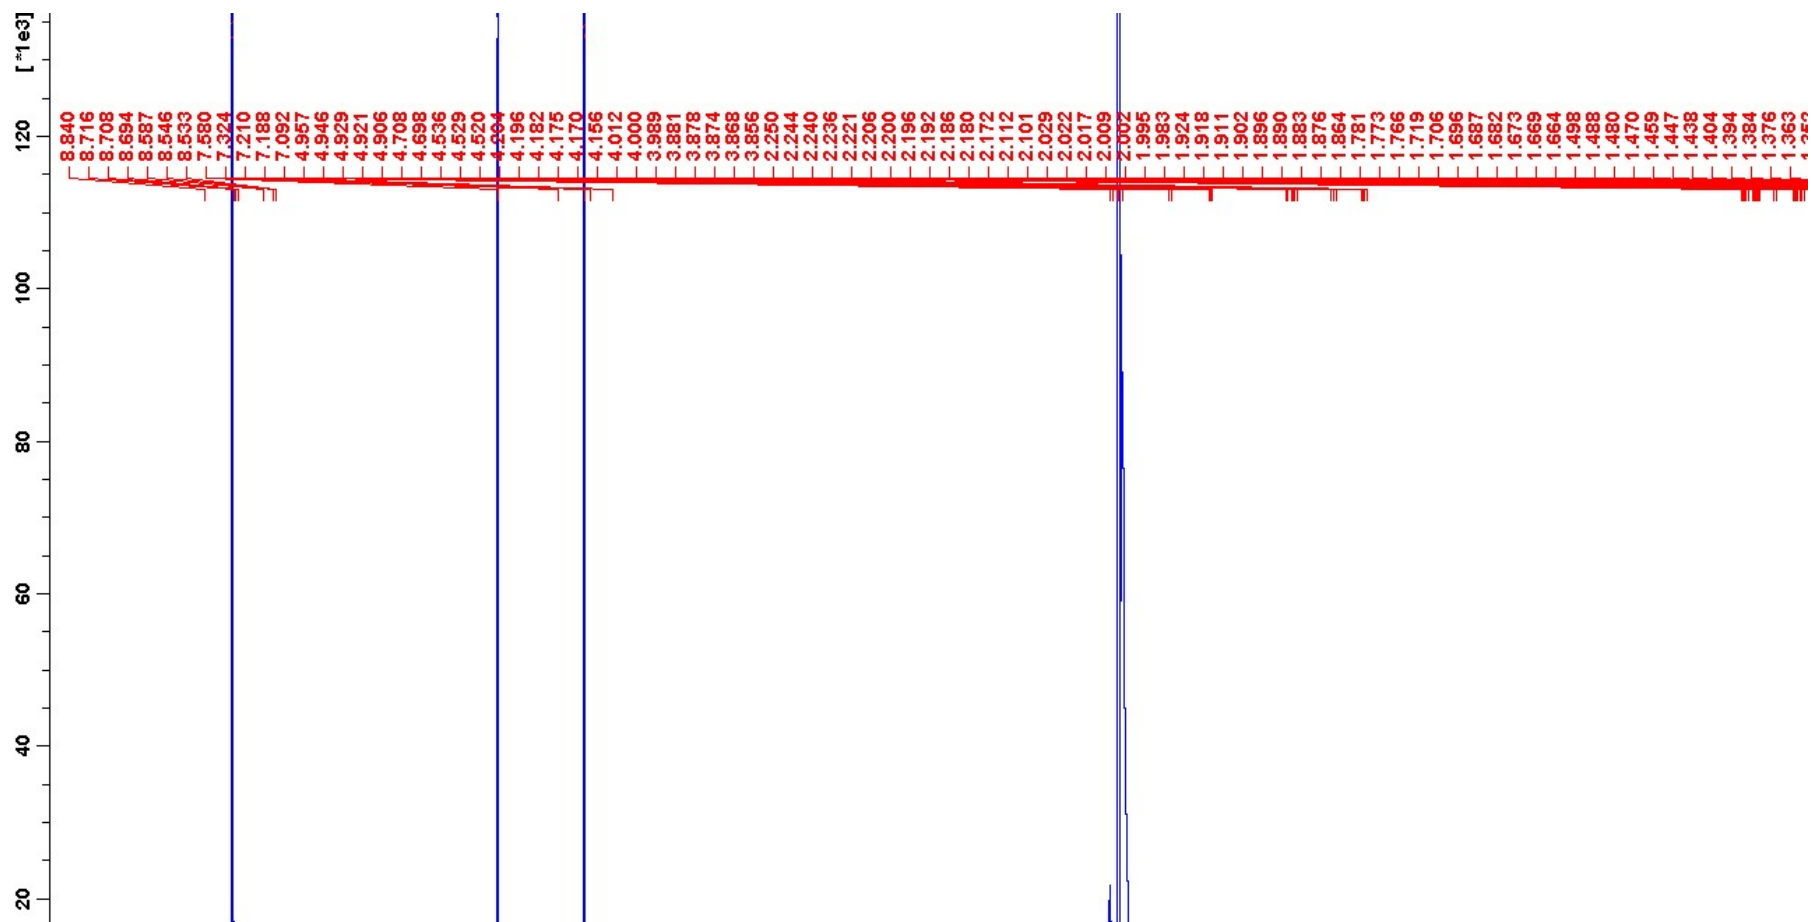

**Figure S33.**  $^{13}\text{C}$ -NMR spectrum of cerebroside **8** in  $\text{C}_5\text{D}_5\text{N}$ .

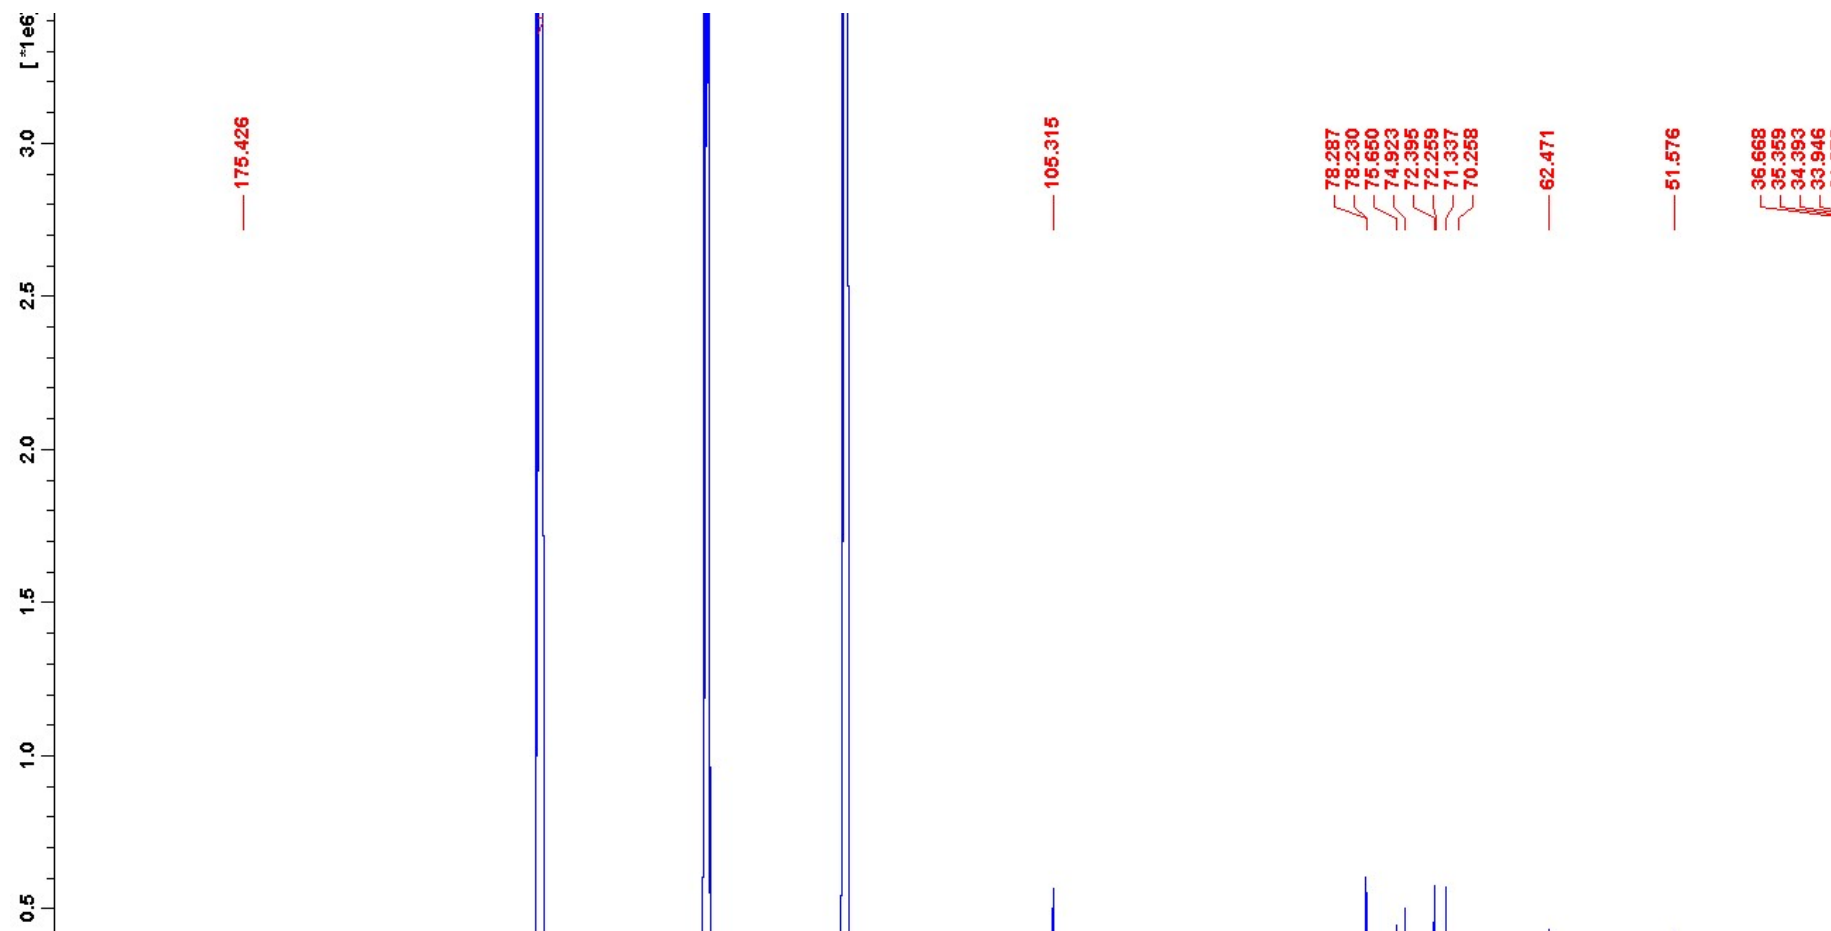

**Figure S34.**  $^1\text{H}$ - $^1\text{H}$ -COSY spectrum of cerebroside 8 in  $\text{C}_5\text{D}_5\text{N}$ .

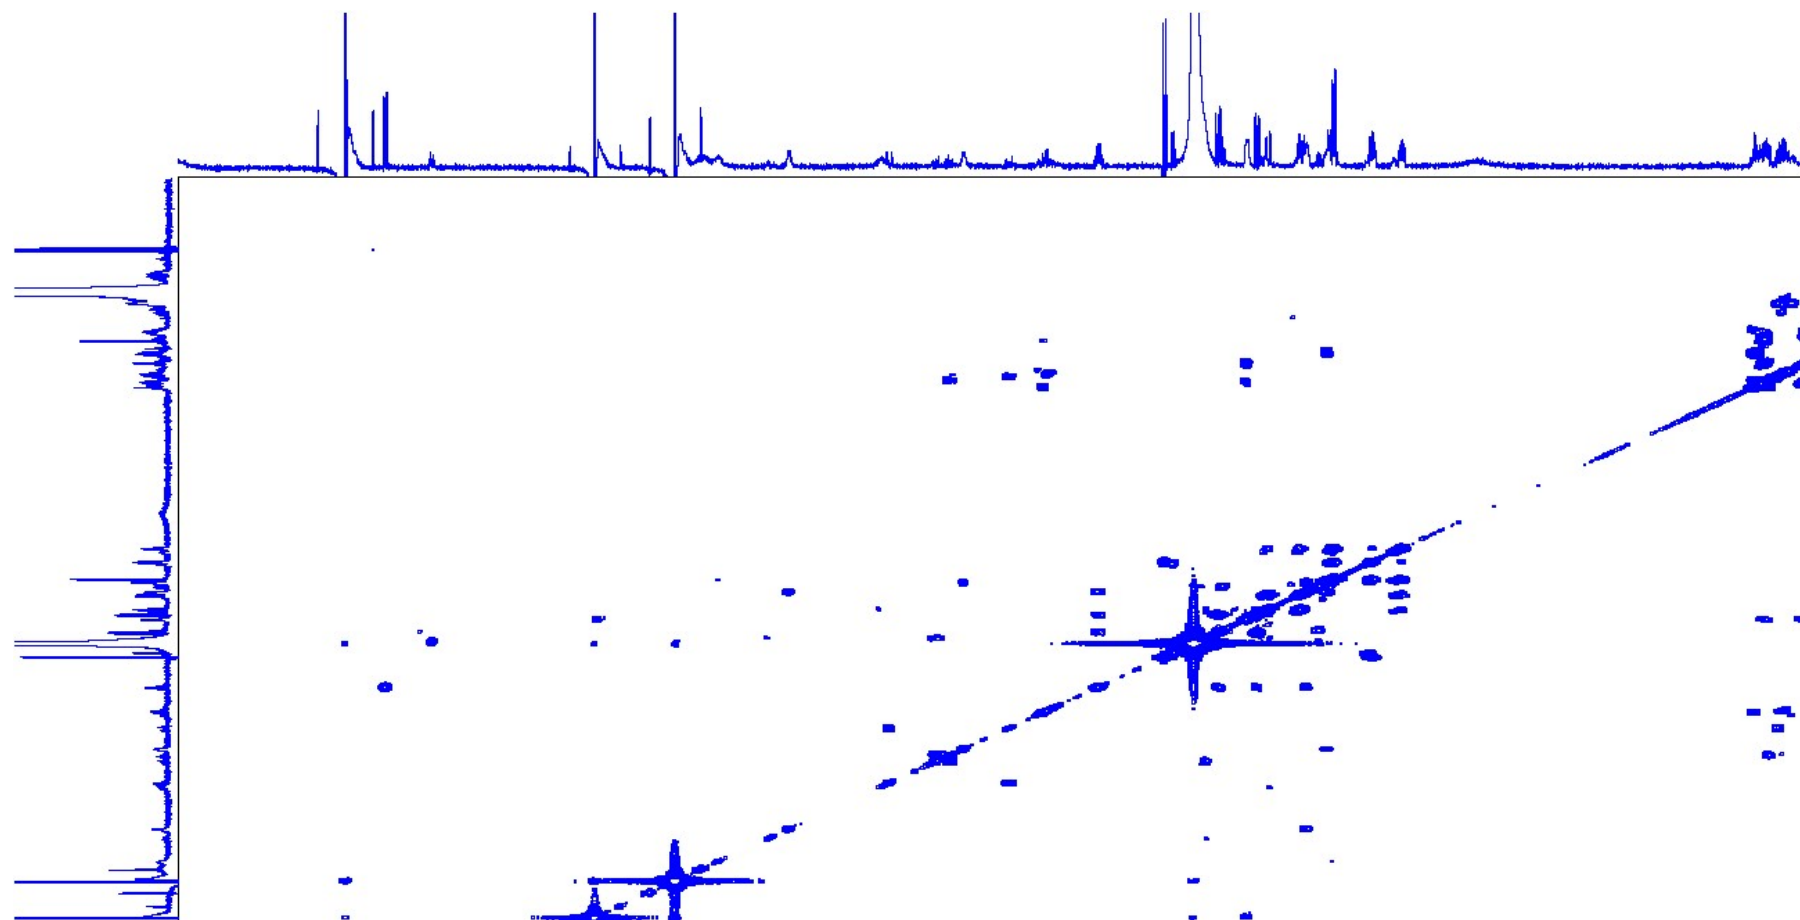

**Figure S35.** HSQC spectrum of cerebroside **8** in C<sub>5</sub>D<sub>5</sub>N.

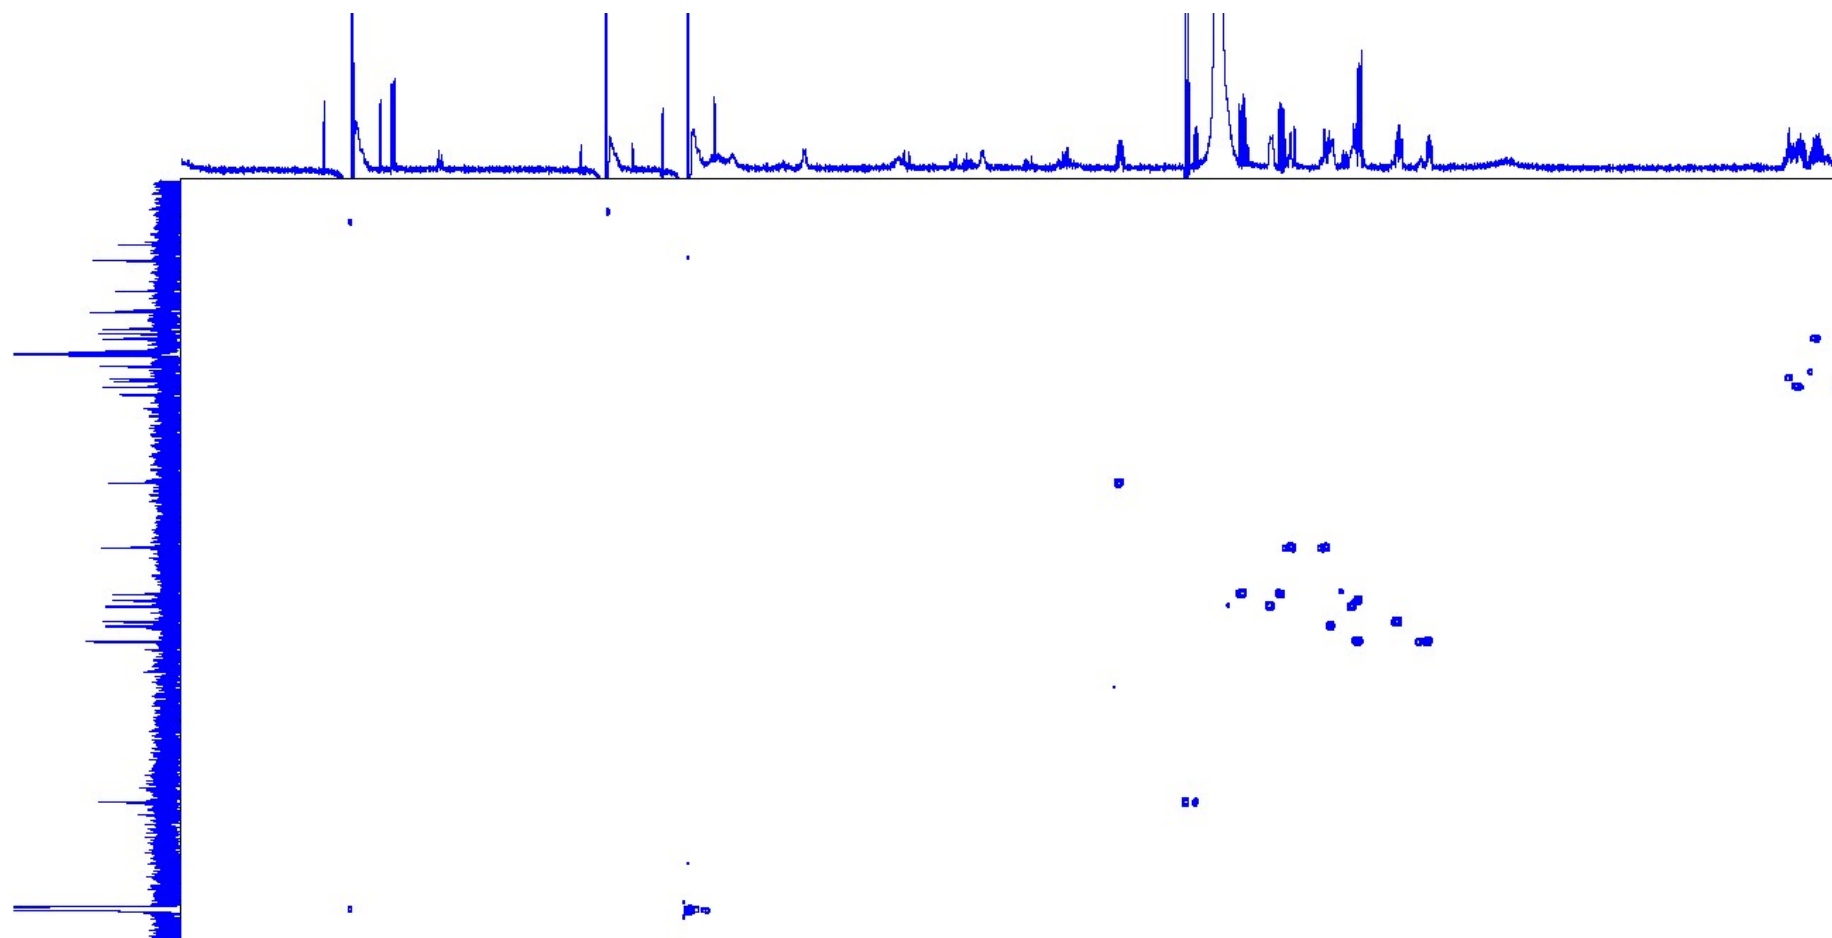

**Figure S36.** HMBC spectrum of cerebroside 8 in C<sub>5</sub>D<sub>5</sub>N.

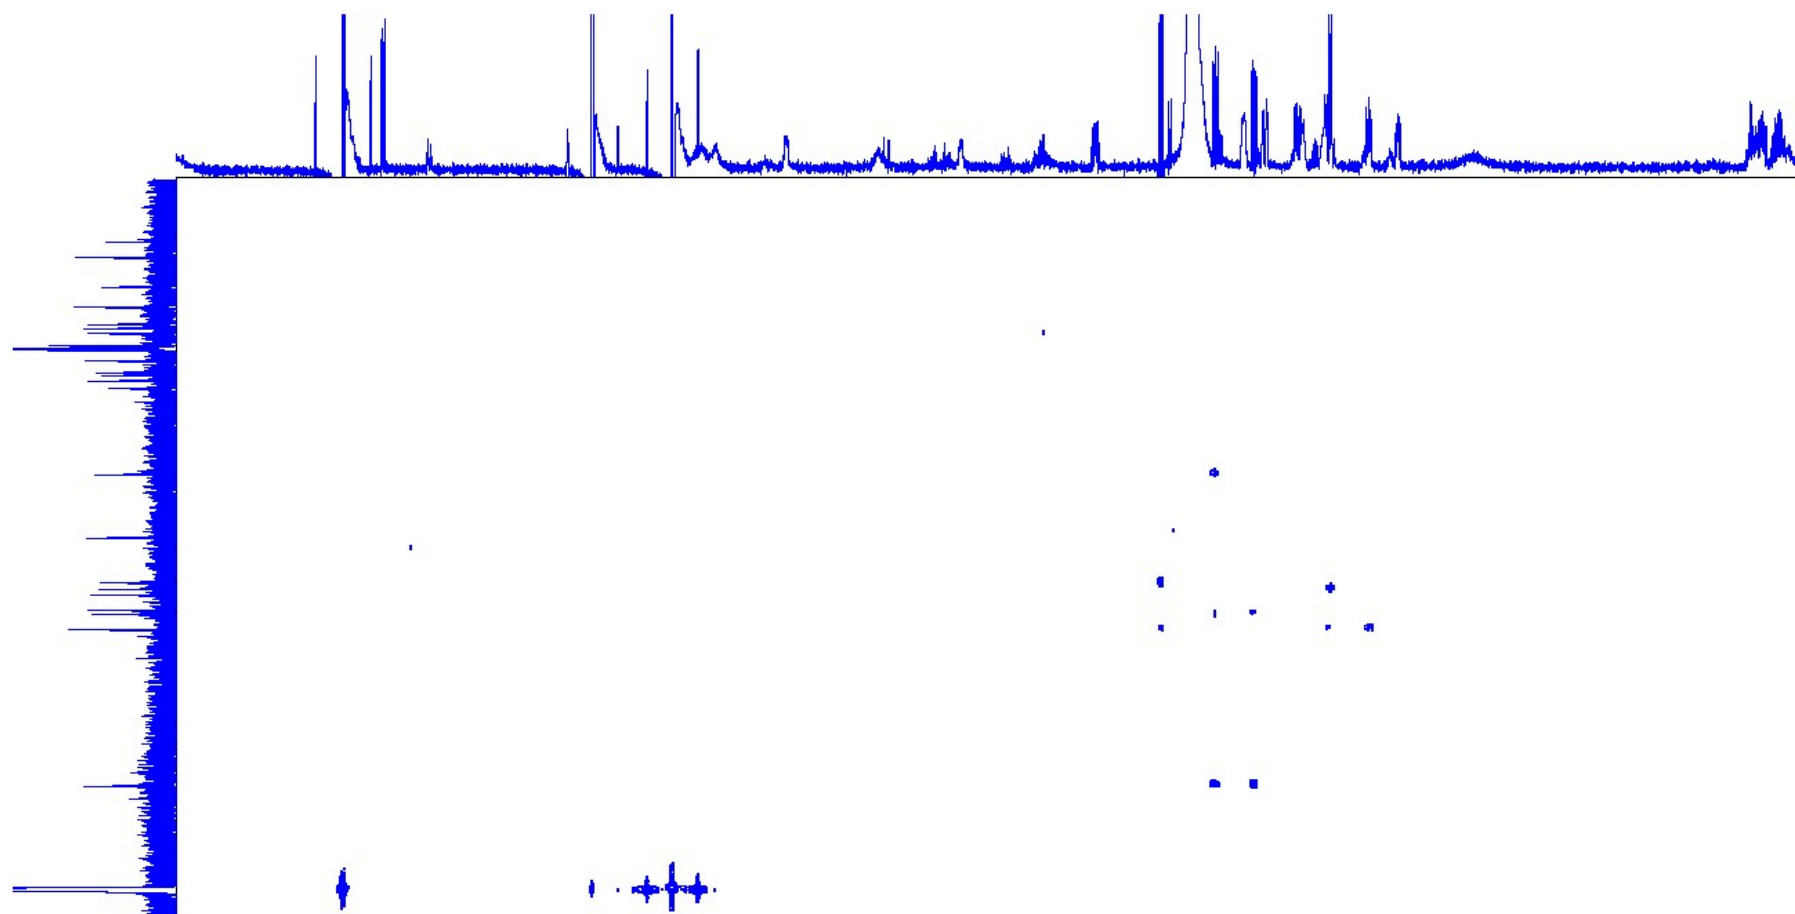

**Figure S37.** (-)-HRESIMS spectrum of cerebroside **9**.

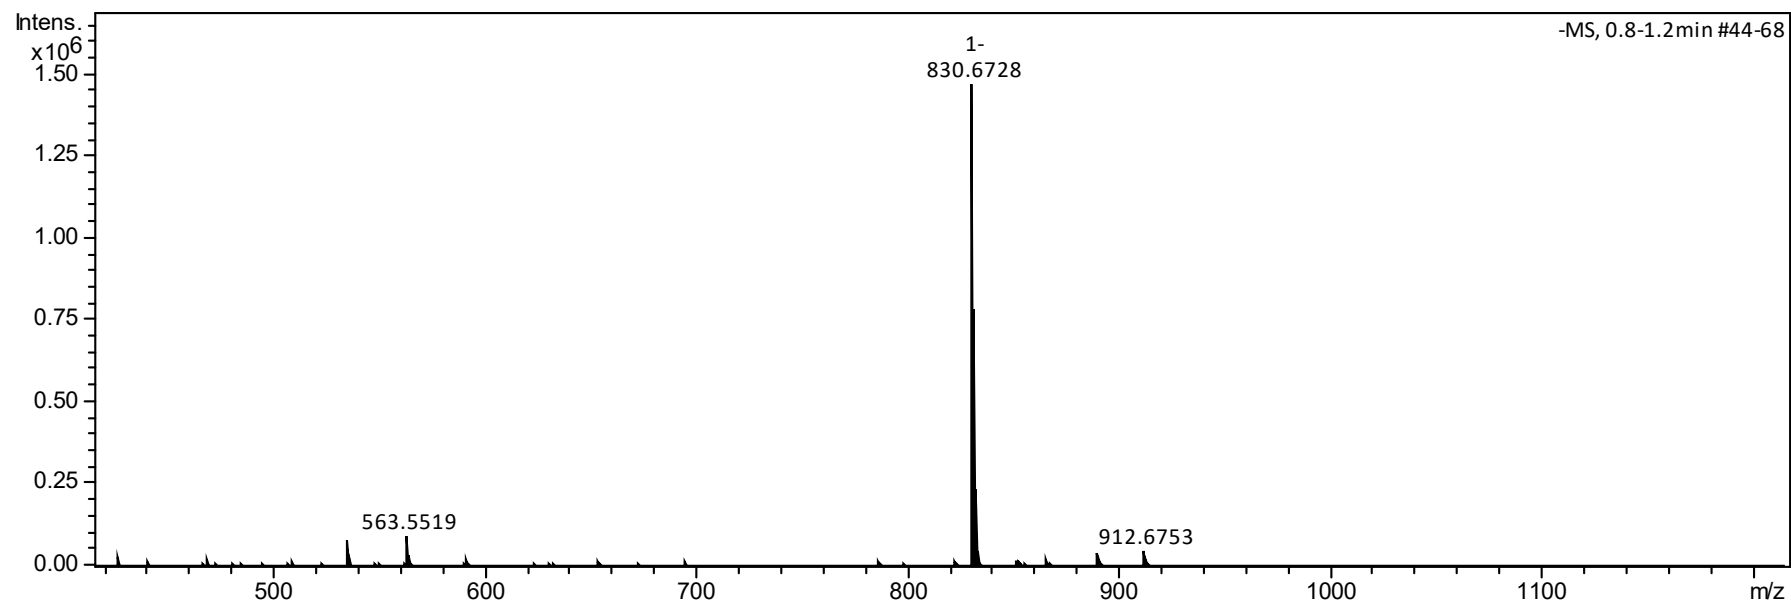



**Figure S38.** (+)-HRESIMS spectrum of cerebroside 9.

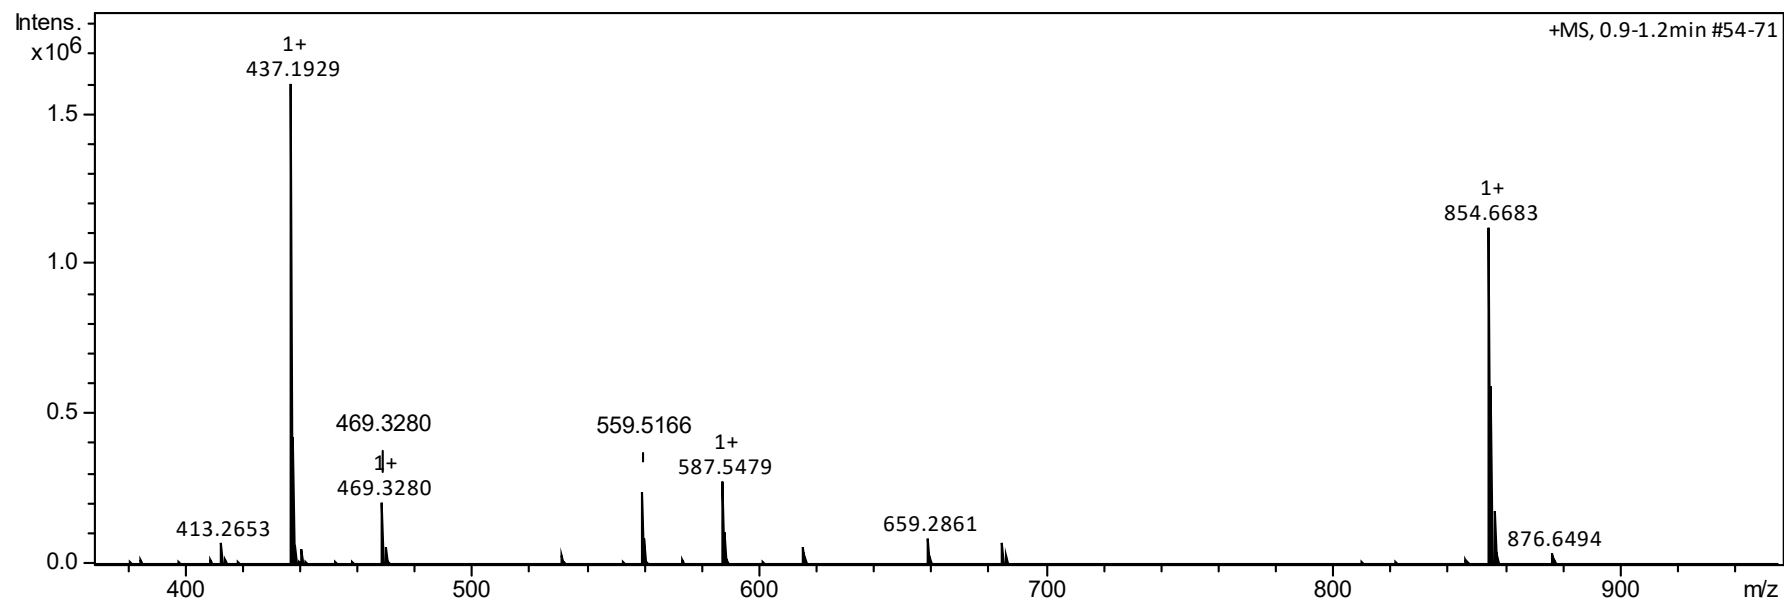

**Figure S39.**  $^1\text{H}$ -NMR spectrum of cerebroside **9** in  $\text{C}_5\text{D}_5\text{N}$ .

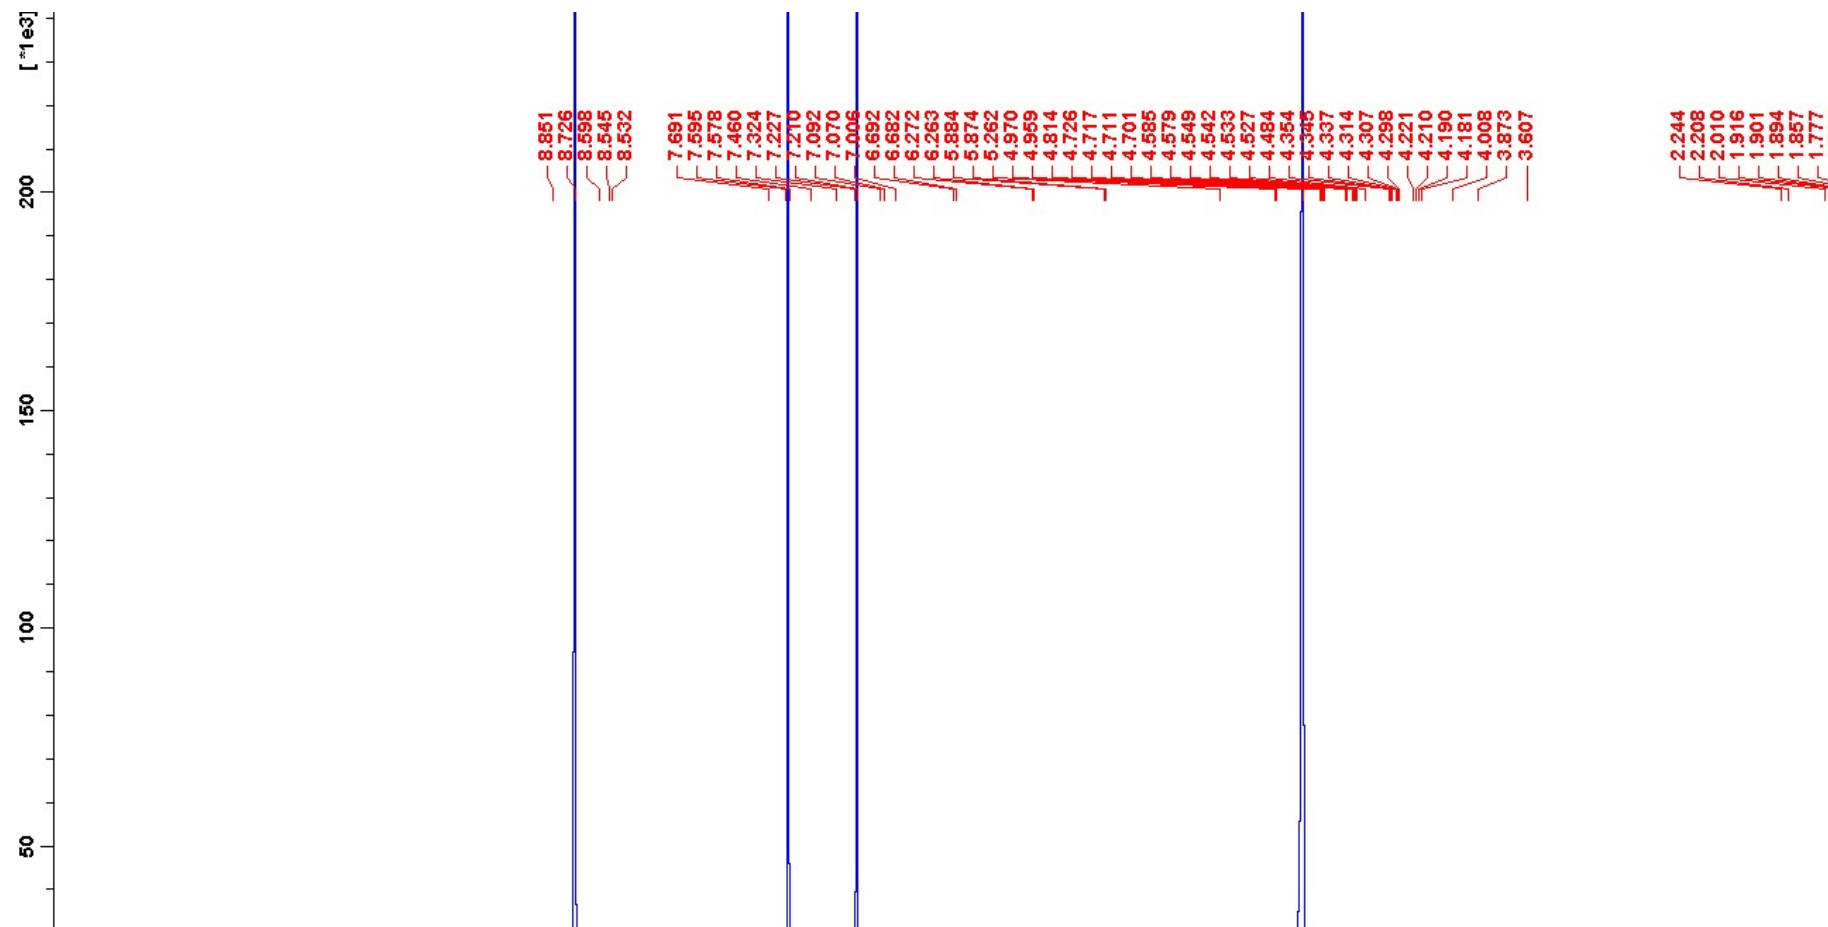

**Figure S40.**  $^{13}\text{C}$ -NMR spectrum of cerebroside **9** in  $\text{C}_5\text{D}_5\text{N}$ .

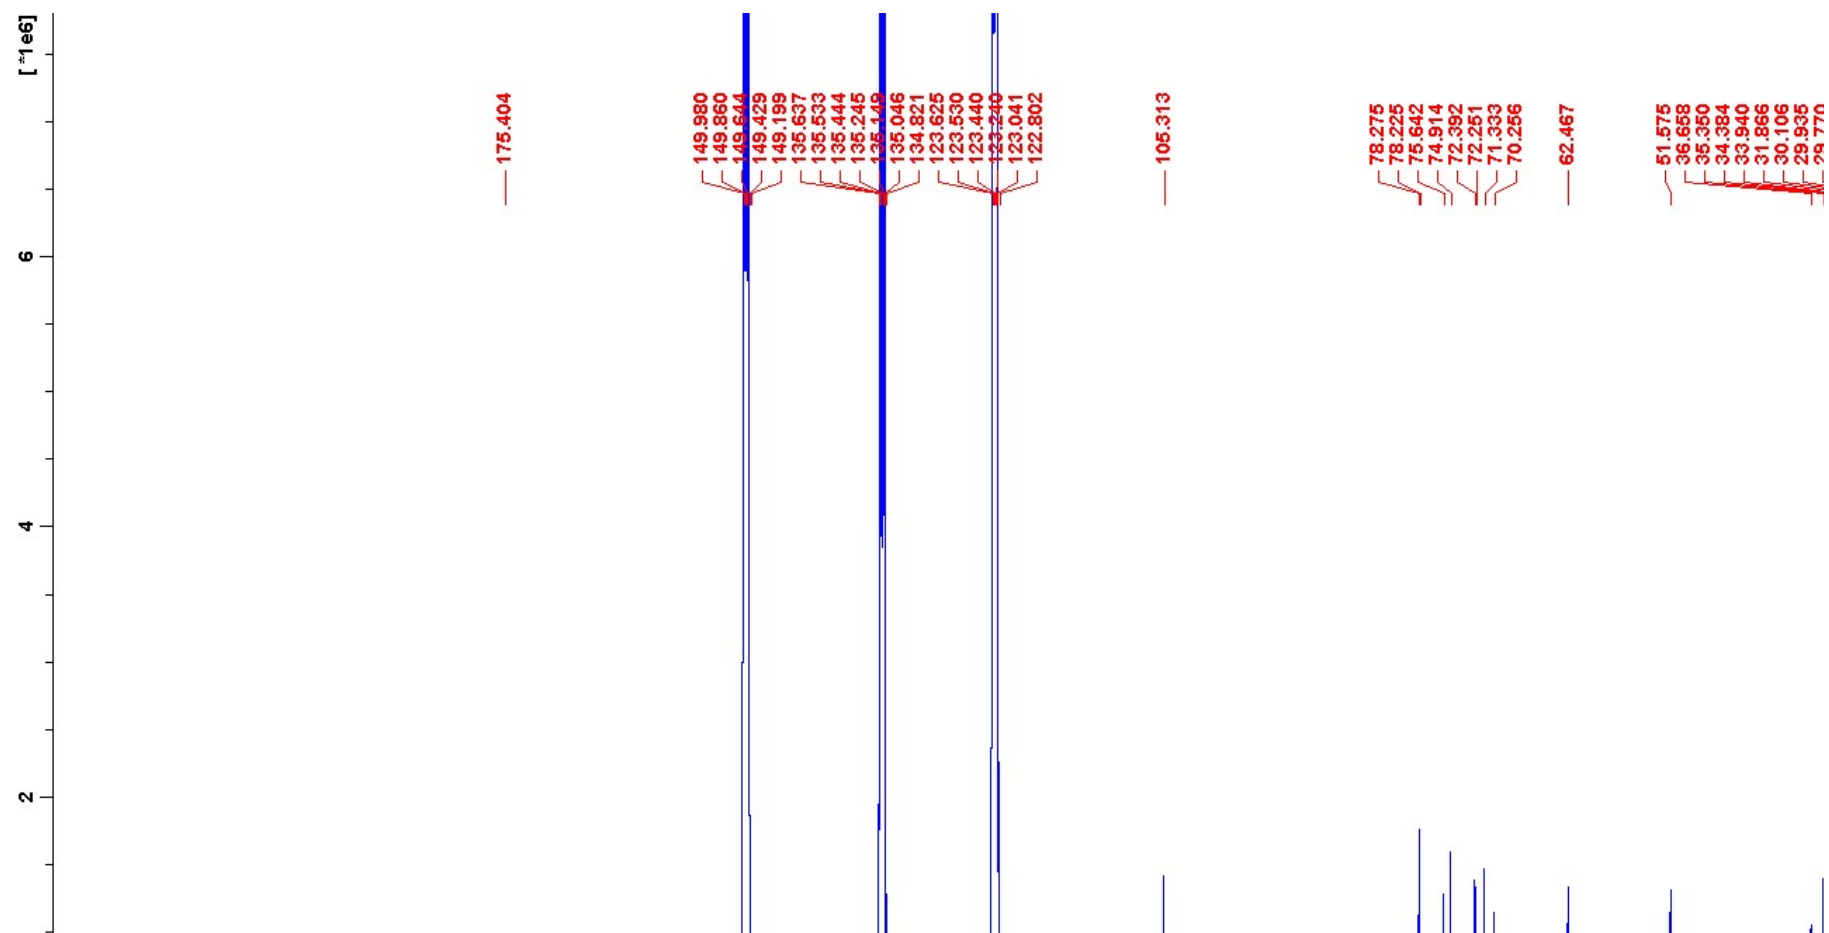

**Figure S41.**  $^1\text{H}$ - $^1\text{H}$ -COSY spectrum of cerebroside **9** in  $\text{C}_5\text{D}_5\text{N}$ .

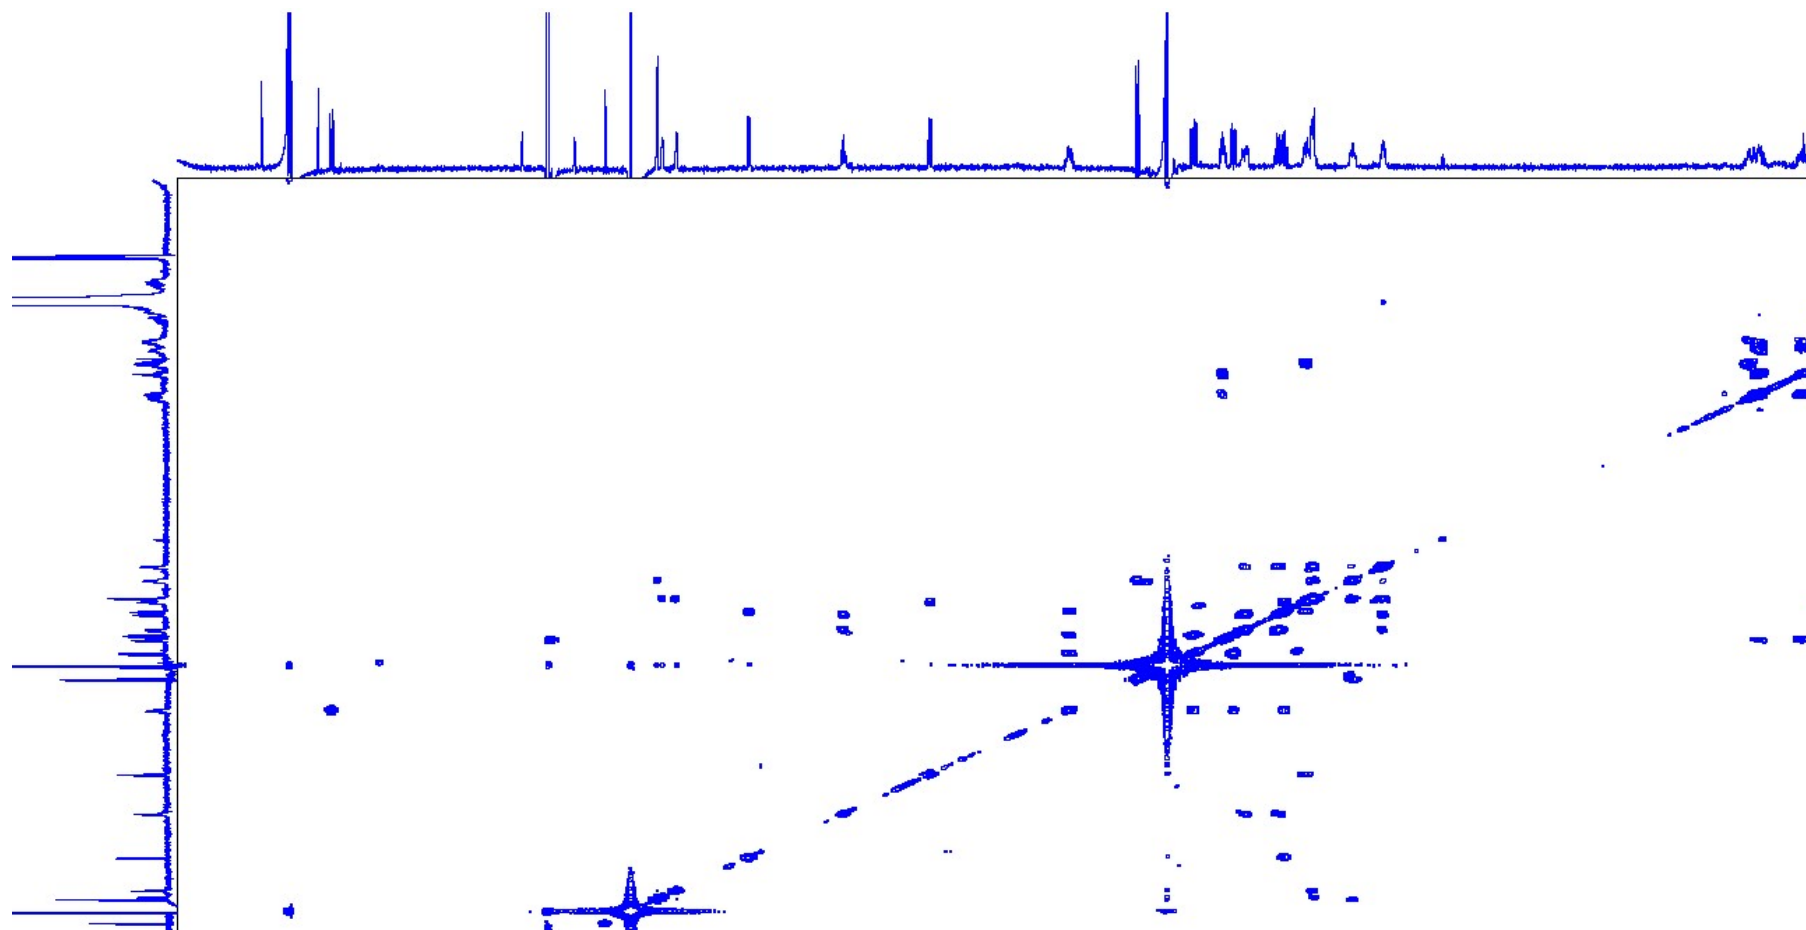

**Figure S42.** HSQC spectrum of cerebroside **9** in C<sub>5</sub>D<sub>5</sub>N.

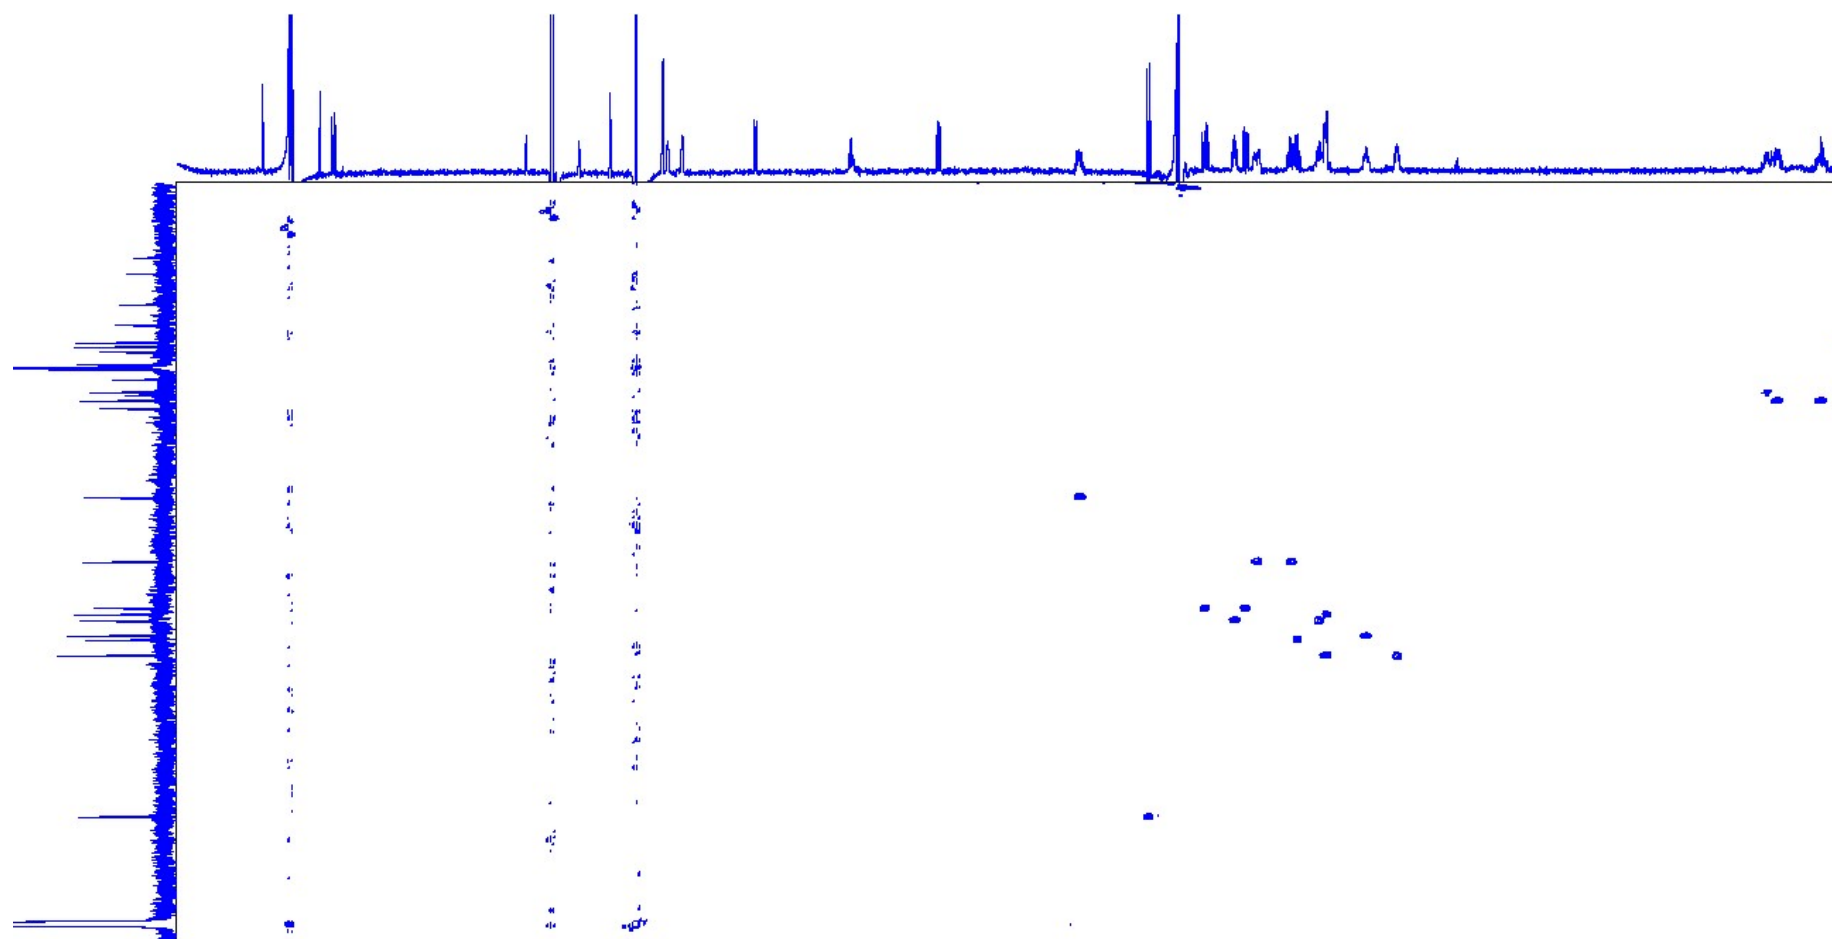

**Figure S43.** HMBC spectrum of cerebroside **9** in C<sub>5</sub>D<sub>5</sub>N.

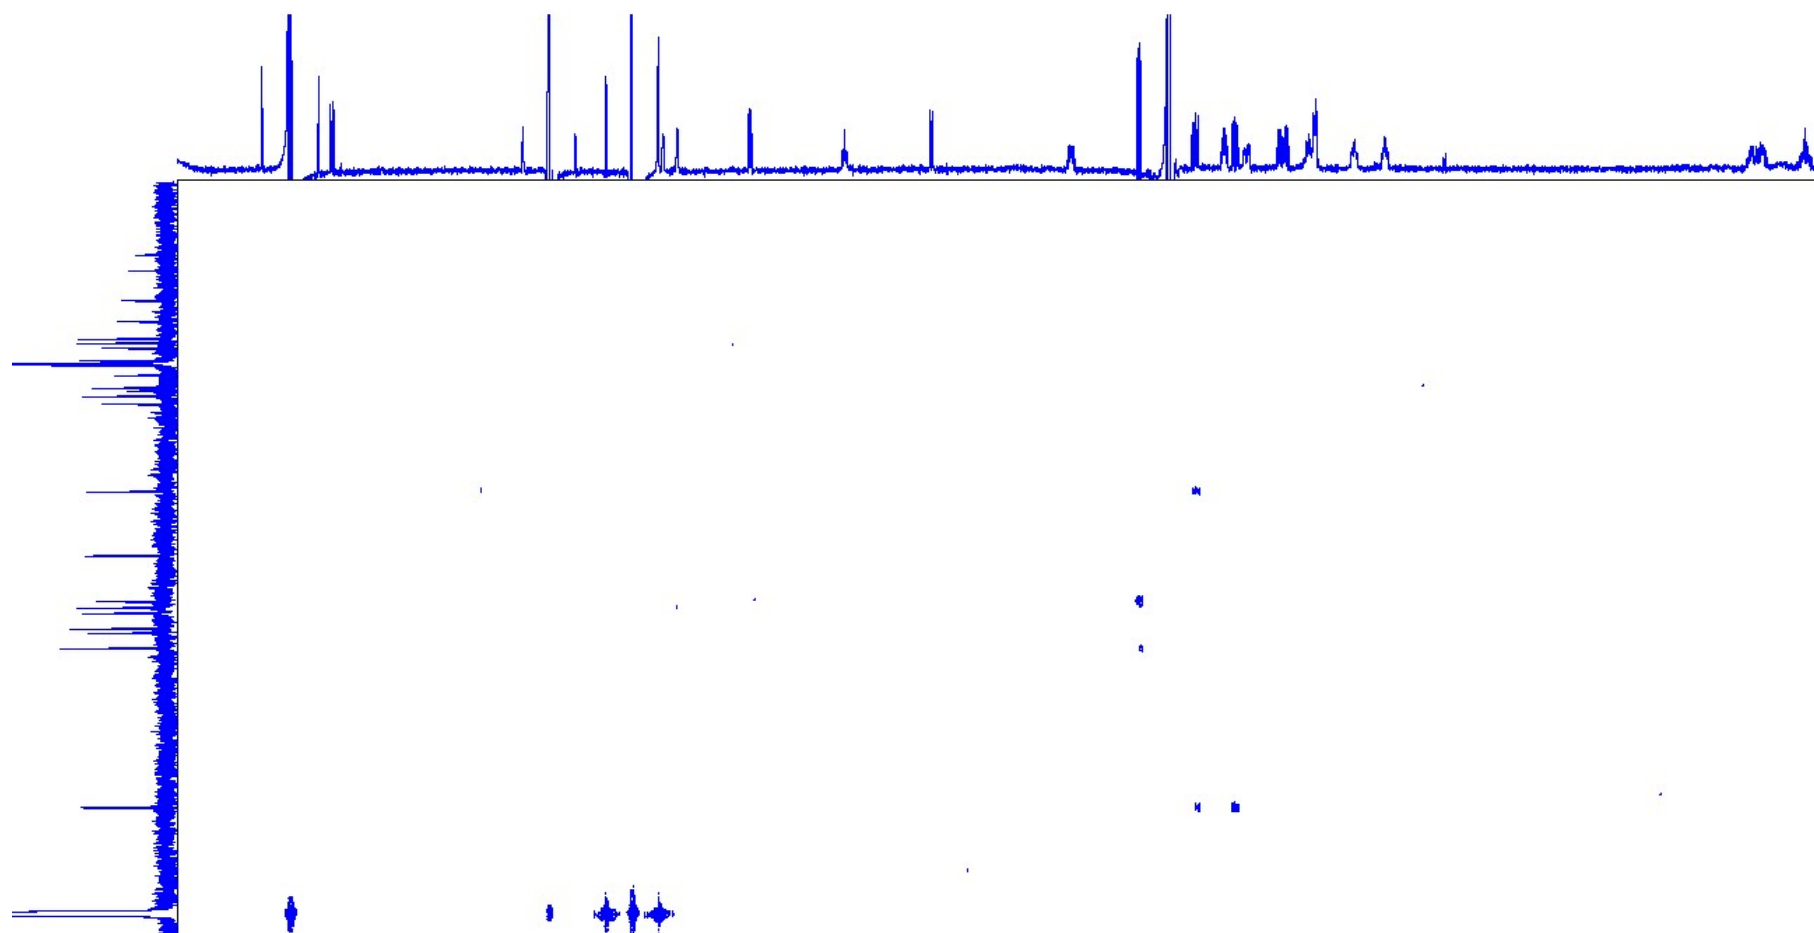

Supplement: s1 [file s1]
